# Supplementary material for: Exploring transmembrane allostery in the MexB: DB08385 variant as a promising inhibitor-like candidate against Pseudomonas aeruginosa antibiotic resistance: a computational study
Source: Royal Society of Chemistry journal article supplement (doi:10.1039/d4cp01620c), 2024-01-01
Supplement: d4cp01620c1.pdf [file d4cp01620c1.pdf]

## Exploring the Transmembrane Allostery in MexB: DB08385 Variant as Promising Inhibitor like Candidate Against *Pseudomonas aeruginosa* Antibiotic Resistance – A Computational Study

Abhishek Bera<sup>a</sup>, Shreya Mukherjee<sup>a</sup>, Niladri Patra<sup>a\*</sup>

Email: [npatra2@iitism.ac.in](mailto:npatra2@iitism.ac.in)

<sup>a</sup>Department of Chemistry & Chemical Biology, Indian Institute of Technology (ISM)  
Dhanbad, Dhanbad-826004, India

### Supporting Information

#### Index

1. **Table. S1** ..... Top ten scoring molecules obtained from DrugRep ligand-based pharmacophore search using BDM88855 as reference molecule.
2. **Figure. S1** ..... Comparison of the average RMSD fluctuation of the transmembrane @CA atoms of (a) MexB L protomer and MexB L protomer (trio); (b) DB08385, Variant 1 and Variant 2 bound MexB systems.
3. **Figure. S2** ..... Selected suitable flexible docking poses of (a) BDM88855, (b) DB08385, (c) 2-Cl DB08385 or Variant 1 and (d)-Cl DB08385 or Variant 2 used as initial structure for MD simulation along with their respective vina scores.
4. **Figure. S3** ..... Centre-of-mass distance between (a) DB08385 (deprot), (c) 2-Cl DB08385 (deprot) and (d)-Cl DB08385 (deprot) and ASP407-ASP408-LYS939 triad of MexB transmembrane site during unbiased MD simulation.
5. **Figure. S4** ..... Transmembrane pocket volume for apo and different ligand bound MexB systems.
6. **Figure. S5** ..... Graphical representation of equilibrium ligand positions obtained from MD trajectories - (a) DB08385 (Conf 1), (b) DB08385 (Conf 2), (c) Variant 1 and (d) Variant 2 inside the TM cavity of MexB.
7. **Figure. S6** ..... Radius of Gyration of TM4 and TM10 for the apo and ligand bound MexB systems.
8. **Figure. S7** ..... Bar plot showing occupancies for the three hydrogen bond interactions, e.g., ASP408-LYS939, ASP407-LYS939 and ASP407-ARG969 in apo, DB08385, Variant 1 and Variant 2 bound MexB systems.

9. **Figure. S8** ..... Probability distribution plots showing adequate overlapping between consecutive sampling windows for (a) DB08385 (Conf 1), (b) DB08385 (Conf 2), and (c) Variant 1 bound MexB systems.
10. **Figure. S9** ..... Dynamic Cross Correlation Matrices for (a) apo, (b) DB08385 (Conf1), (c) DB08385 (Conf2), (d) Variant 1 (Var1), and (e) Variant 2 (Var2) bound MexB systems.
11. **Figure. S10** ..... Variation in eigenvector centralities for apo and Variant 1 bound MexB L protomer. Blue dots indicate important nodes in protein communication network where more intensity of the blue color signifying more central nodes among them.
12. **Table. S2** ..... Eigenvector centralities for apo, DB08385 (Conf 1 and 2), Variant1 bound MexB L protomer along with their respective deviations from apo structure.
13. **Figure. S11** ..... Line plot showing comparative root mean squared fluctuation values for apo and ligand bound MexB L protomer excluding Variant 1.
14. **Section. S1** ..... gmx\_MMPBSA input parameters.

**Table. S1.** Top ten scoring molecules obtained from DrugRep ligand-based pharmacophore search using BDM88855 as reference molecule.

| DrugBank ID | Name                                                | Similarity score | M.W (g/mol) | ALogP  | HB D | HB A | R B | Remarks                                                           |
|-------------|-----------------------------------------------------|------------------|-------------|--------|------|------|-----|-------------------------------------------------------------------|
| DB08385     | 4-(Quinolin-3-ylmethyl)piperidine-1-Carboxylic Acid | 0.350            | 270.33      | 2.841  | 1    | 3    | 3   | Related to PF 750, FAAH inhibitor, Perfect fit for MexB TM groove |
| DB14202     | 2-(Morpholinothio)benzothiazole                     | 0.324            | 252.4       | 2.399  | 0    | 4    | 2   | Standardized Chemical Allergen                                    |
| DB02428     | Quinoline-2-carboxylic acid                         | 0.318            | 173.17      | 2.074  | 1    | 3    | 1   | Endogenous metabolite, too small for MexB TM pocket               |
| DB13823     | Pipemidic acid                                      | 0.287            | 303.32      | -2.335 | 2    | 8    | 3   | pyridopyrimidine                                                  |

|         |                                                                                       |       |        |       |   |   |   |                                              |
|---------|---------------------------------------------------------------------------------------|-------|--------|-------|---|---|---|----------------------------------------------|
|         |                                                                                       |       |        |       |   |   |   | antibiotic derivative                        |
| DB13437 | Medazepam                                                                             | 0.280 | 270.75 | 4.139 | 0 | 2 | 1 | Anxiolytic, anticonvulsant, and sedative     |
| DB04690 | Camptothecine                                                                         | 0.278 | 348.4  | 1.746 | 1 | 5 | 1 | An EC 5.99.1.2 (DNA topoisomerase) inhibitor |
| DB09197 | Mepiprazole                                                                           | 0.276 | 304.82 | 3.25  | 1 | 3 | 4 | A minor tranquilizer                         |
| DB13611 | Chlormidazole                                                                         | 0.275 | 256.73 | 4.06  | 0 | 1 | 2 | Antifungals                                  |
| DB04582 | (R)-Imazaquin                                                                         | 0.270 | 311.33 | 2.652 | 2 | 5 | 3 | Herbicide                                    |
| DB06852 | (S)-3-(1H-benzo[d]imidazol-2-yl)-6-chloro-4-(quinuclidin-3-ylamino)quinolin-2(1H)-one | 0.266 | 419.9  | 3.089 | 3 | 4 | 3 | potent inhibitor of Chk1                     |

**Figure. S1.** Comparison of the average RMSD fluctuation of the transmembrane @CA atoms of (a) MexB L protomer and MexB L protomer (trio); (b) DB08385, Variant 1 and Variant 2 bound MexB systems.

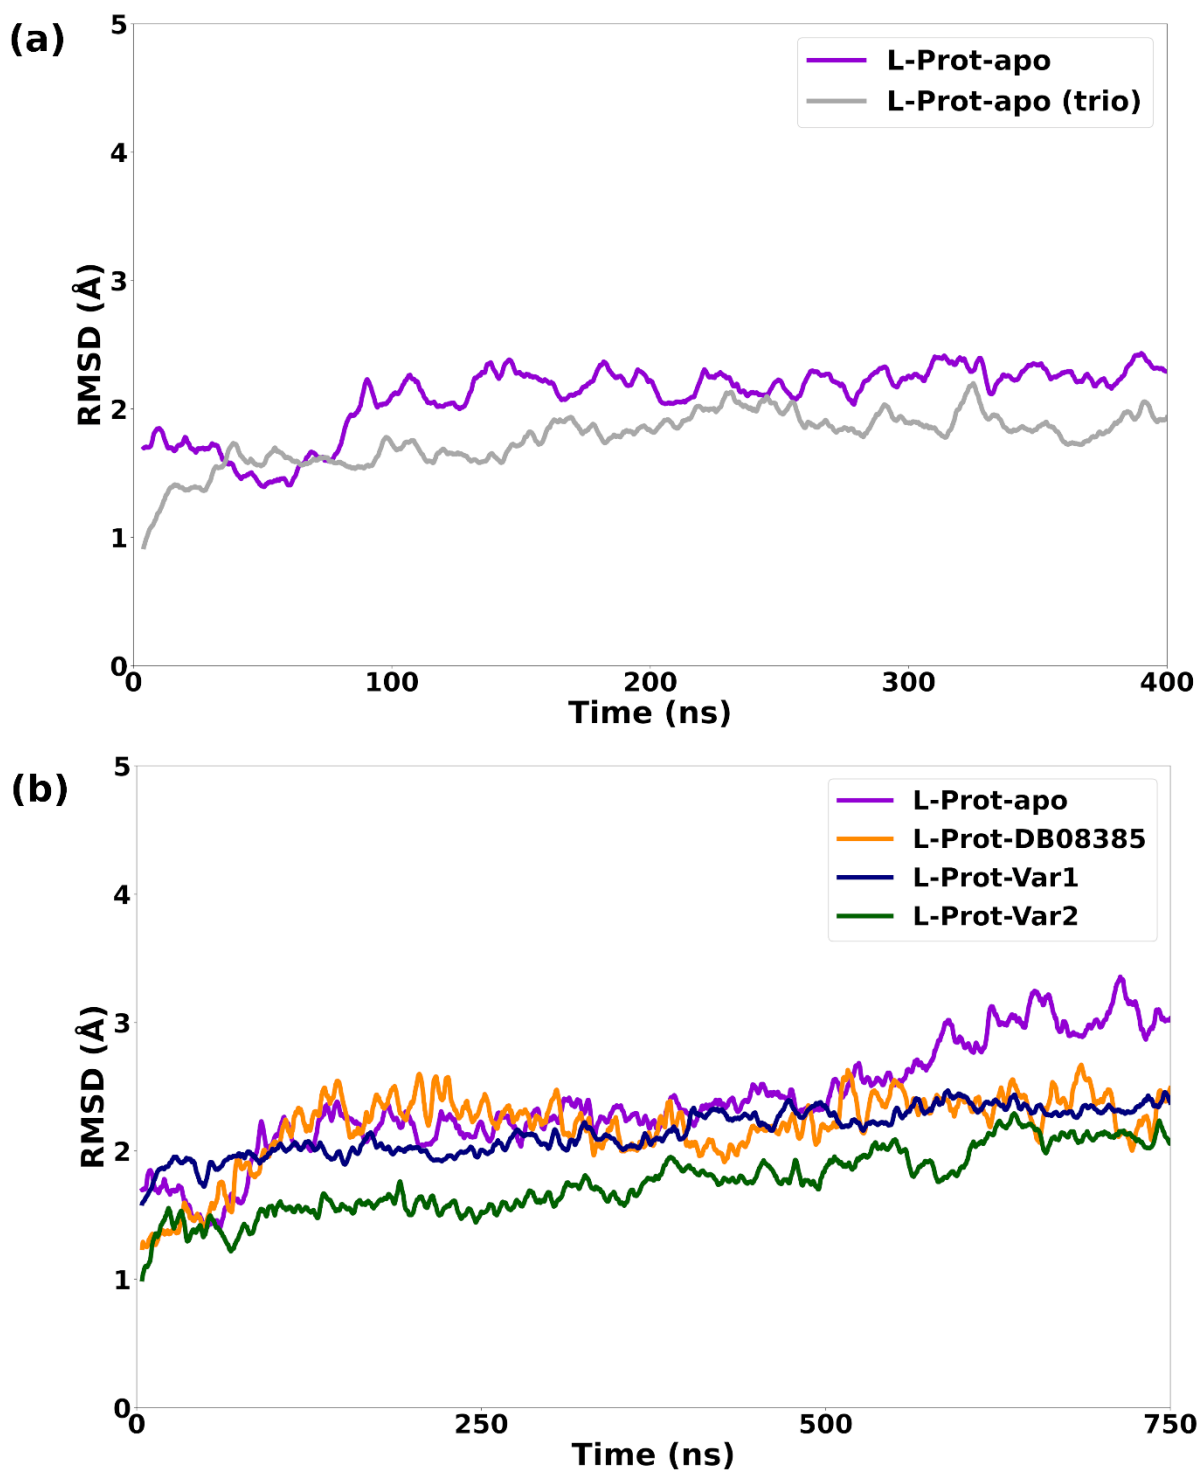

**Figure. S2.** Selected suitable flexible docking poses of (a) BDM88855, (b) DB08385, (c) 2-Cl DB08385 or Variant 1 and (d)-Cl DB08385 or Variant 2 used as initial structure for MD simulation along with their respective vina scores.

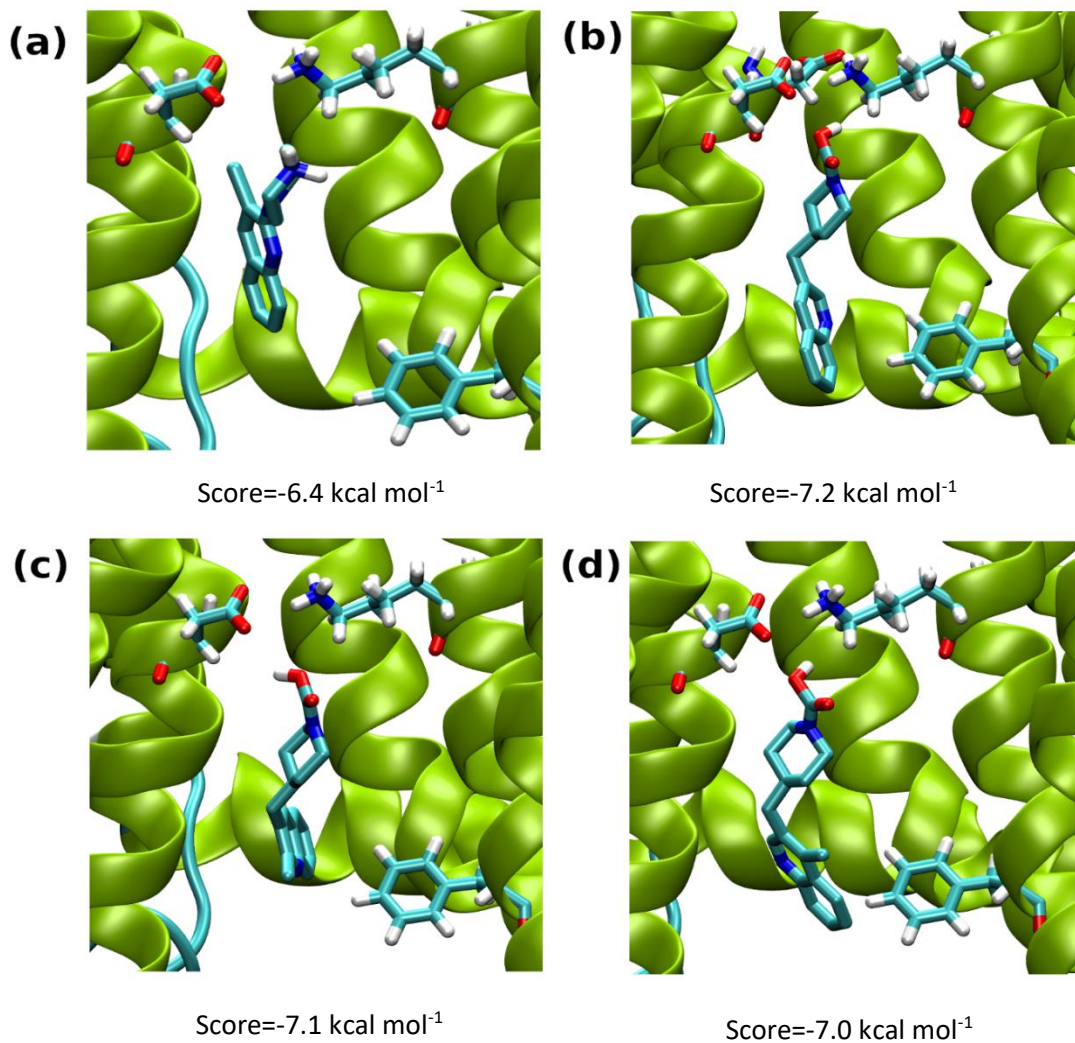

### Flexible docking in Vina

Flexible residues – ASP408, VAL411, LYS939, LEU943, PHE947

center\_x = -2.701, center\_y = -4.592, center\_z = -6.100

size\_x = 12, size\_y = 10, size\_z = 18

exhaustiveness = 25

spacing = 1.0

**Figure. S3.** Center-of-mass distance between (a) DB08385 (deprot), (c) 2-Cl DB08385 (deprot) and (d)-Cl DB08385 (deprot) and ASP407-ASP408-LYS939 triad of MexB transmembrane site during unbiased MD simulation.

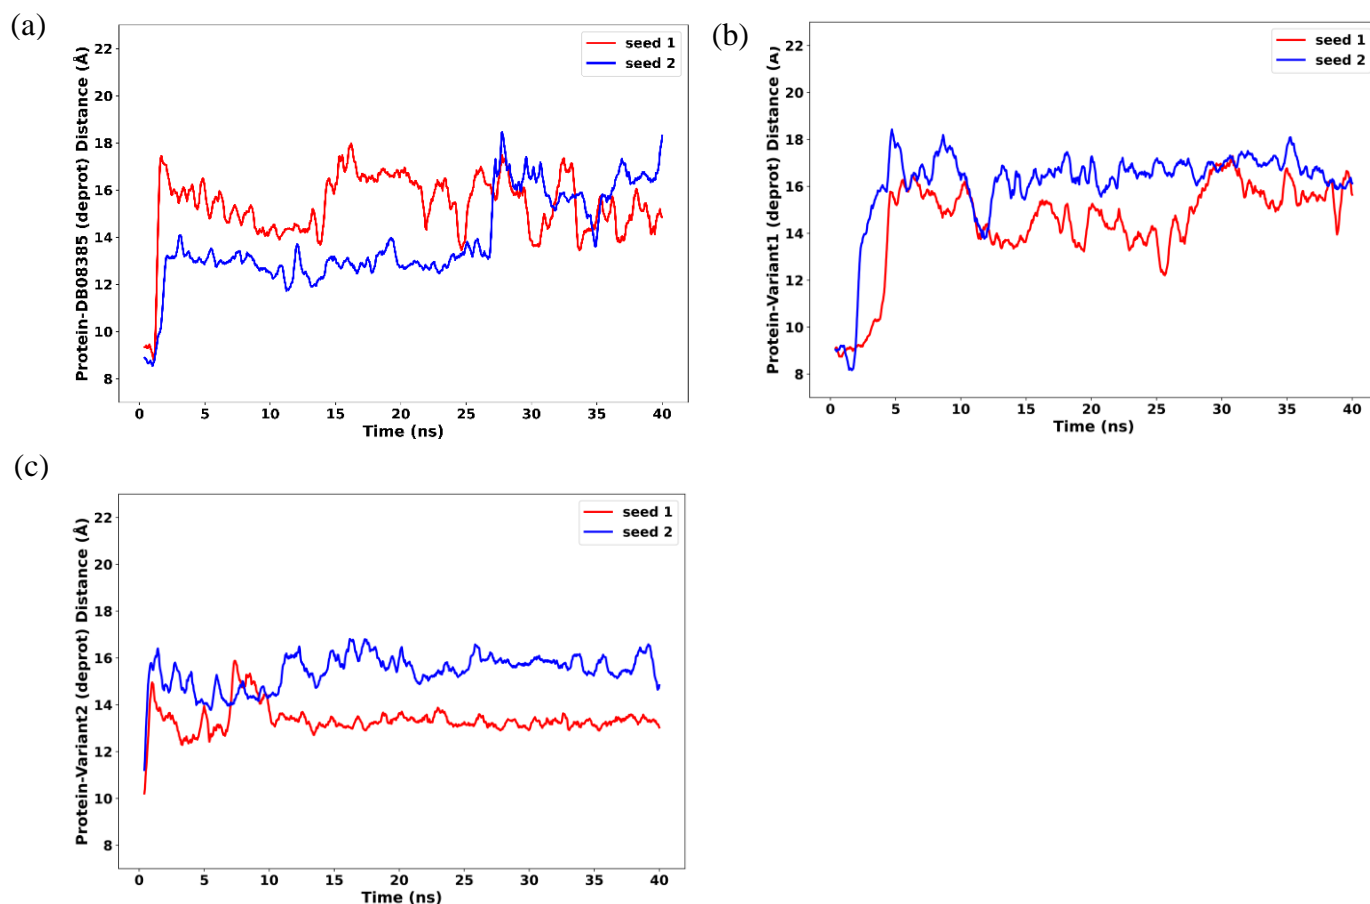

**Figure. S4.** Transmembrane pocket volume for apo and different ligand bound MexB systems.

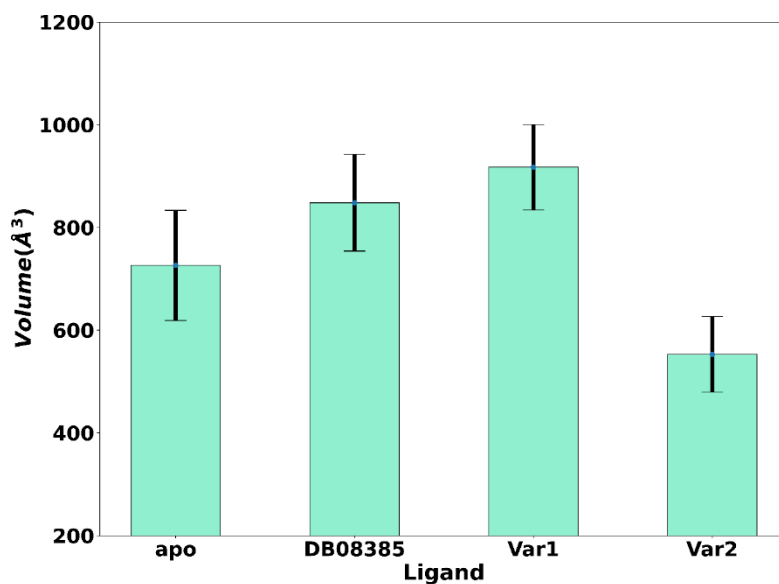

**Figure. S5.** Graphical representation of equilibrium ligand positions obtained from MD trajectories - (a) DB08385 (Conf 1), (b) DB08385 (Conf 2), (c) Variant 1 and (d) Variant 2 (before detachment from binding site) inside the TM cavity

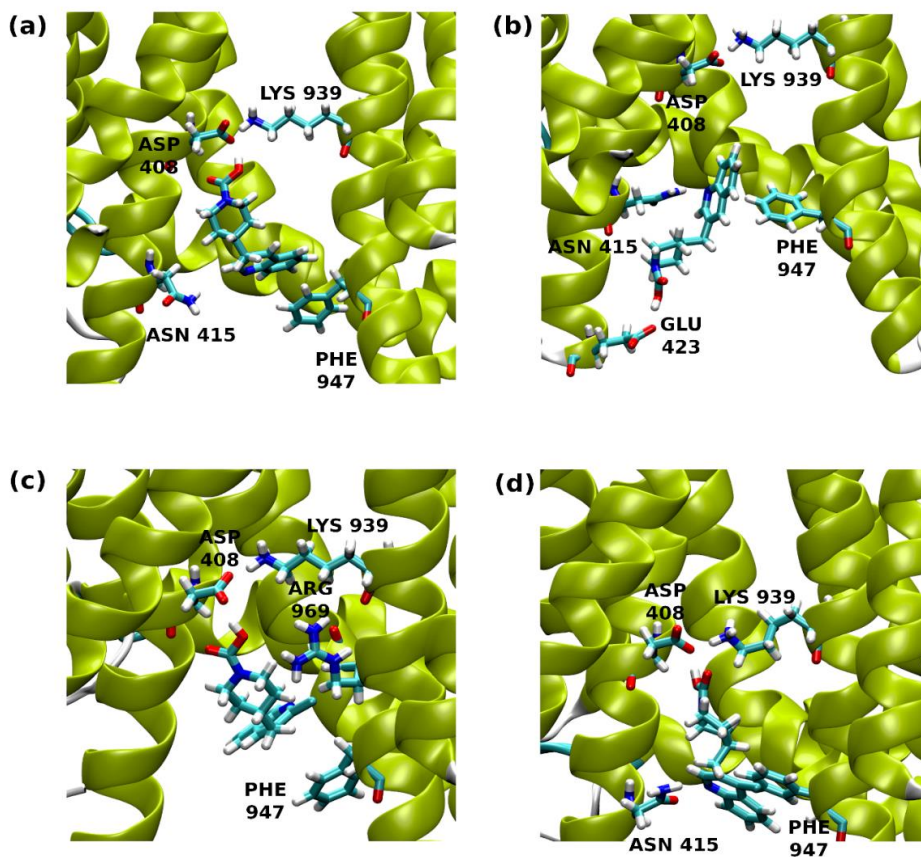

**Figure. S6.** Radius of Gyration of TM4 and TM10 for the apo and ligand bound MexB systems.

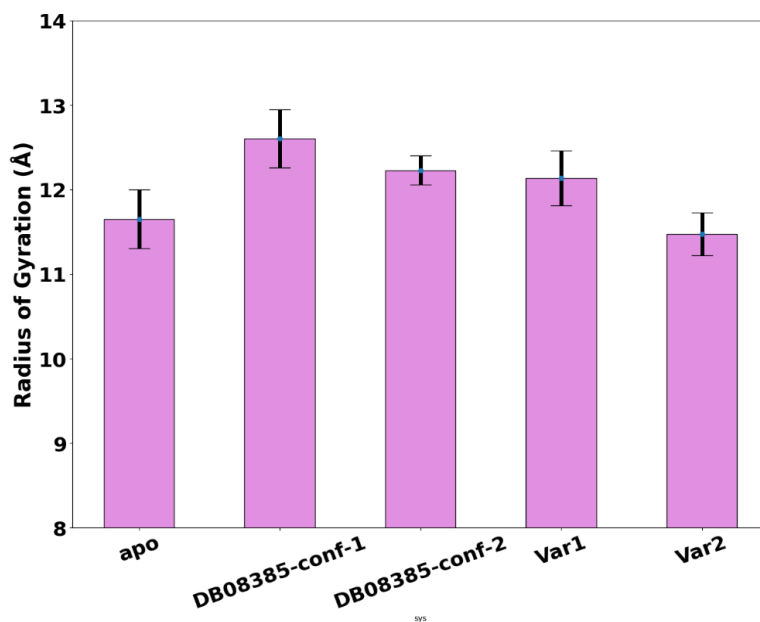

**Figure. S7.** Bar plot showing occupancies for the three hydrogen bond interactions, e.g., ASP408-LYS939, ASP407-LYS939 and ASP407-ARG969 in apo, DB08385, Variant 1 and Variant 2 bound MexB systems.

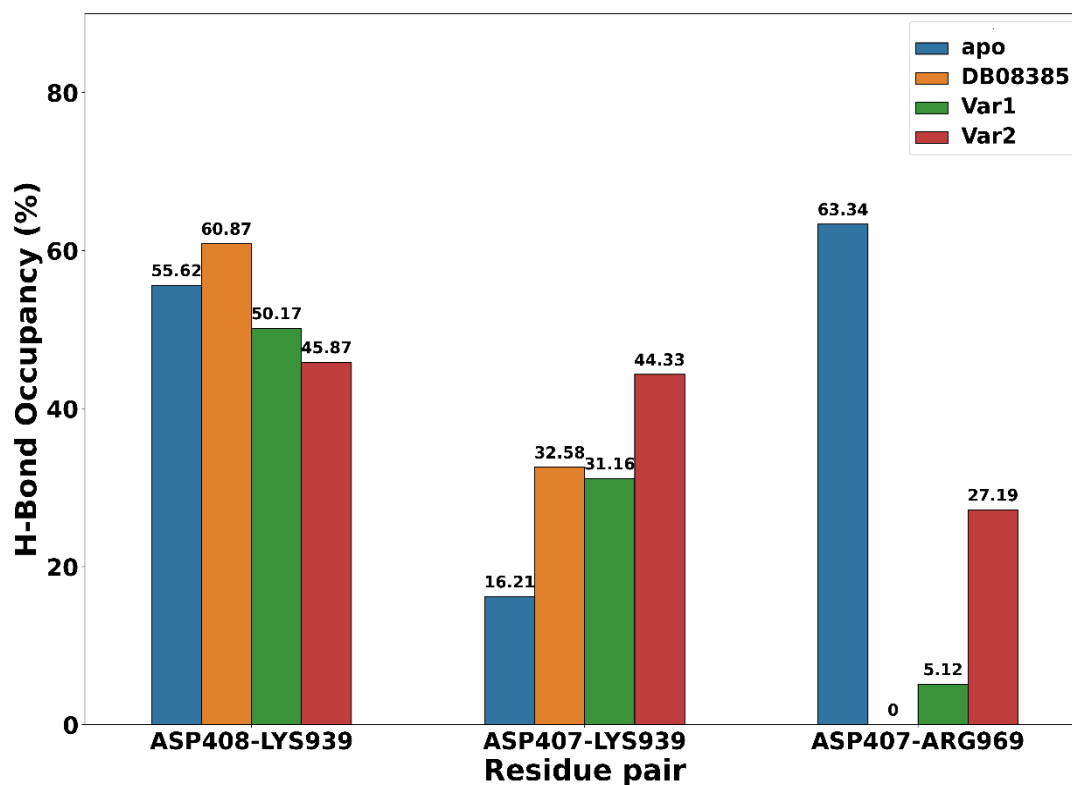

**Figure. S3.** Probability distribution plots showing adequate overlapping between consecutive sampling windows for (a) DB08385 (Conf 1), and (b) Variant 1 bound MexB systems.

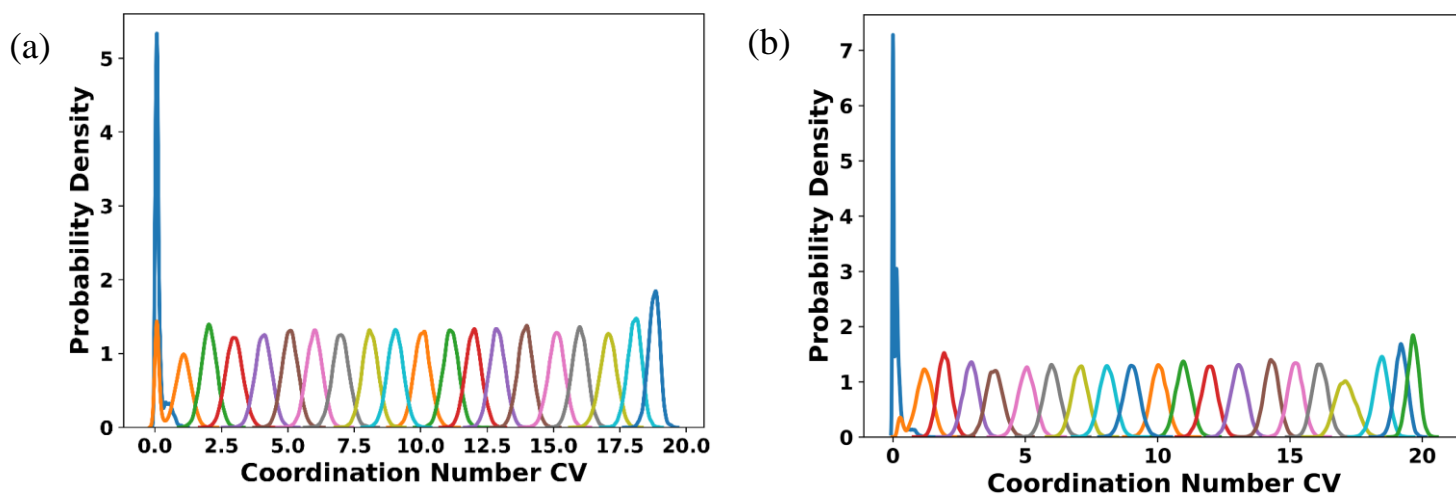



**Figure. S4.** Dynamic Cross Correlation Matrices for (a) apo, (b) DB08385 (Conf1), (c) DB08385 (Conf2), (d) Variant 1 (Var1), and (e) Variant 2 (Var2) bound MexB systems.

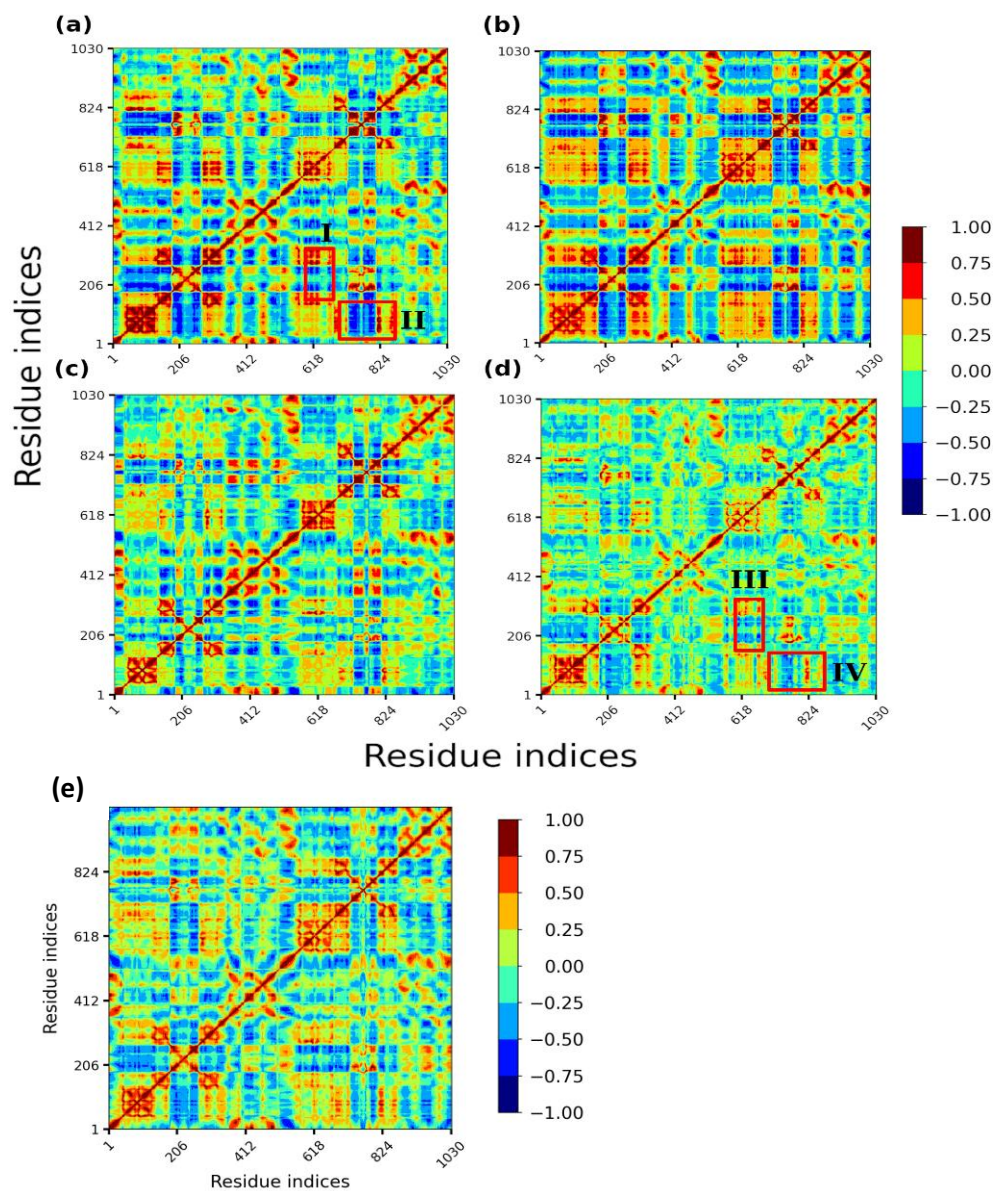

**Figure. S5.** Variation in eigenvector centralities for apo and Variant 1 bound MexB L protomer. Blue dots indicate important nodes in protein communication network where more intensity of the blue color signifying more central nodes among them.

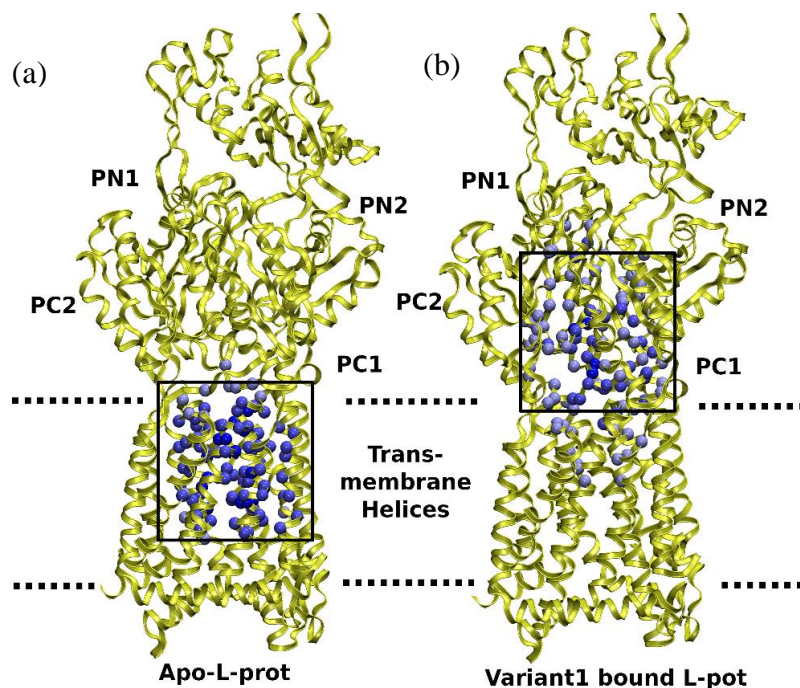

**Table. S2.** Eigenvector centralities for apo, DB08385 (Conf 1 and 2), Variant1 bound MexB L protomer along with their respective deviations from apo structure.

| Residue | Apo   | DB08385 (Conf1) | DB08385 (Conf2) | Variant1 | DB08385 (Conf 1)-Apo | DB08385 (Conf 2)-Apo | Variant1-Apo |
|---------|-------|-----------------|-----------------|----------|----------------------|----------------------|--------------|
| 1       | 0.027 | 0.021           | 0.023           | 0.017    | -0.006               | -0.004               | -0.010       |
| 2       | 0.030 | 0.023           | 0.026           | 0.012    | -0.008               | -0.004               | -0.018       |
| 3       | 0.024 | 0.016           | 0.019           | 0.014    | -0.008               | -0.005               | -0.010       |
| 4       | 0.020 | 0.014           | 0.015           | 0.011    | -0.007               | -0.005               | -0.009       |
| 5       | 0.025 | 0.017           | 0.019           | 0.014    | -0.008               | -0.006               | -0.012       |
| 6       | 0.024 | 0.017           | 0.018           | 0.013    | -0.008               | -0.007               | -0.012       |
| 7       | 0.017 | 0.012           | 0.012           | 0.009    | -0.005               | -0.005               | -0.008       |
| 8       | 0.018 | 0.013           | 0.014           | 0.010    | -0.005               | -0.004               | -0.008       |
| 9       | 0.022 | 0.016           | 0.017           | 0.012    | -0.006               | -0.005               | -0.010       |

|    |       |       |       |       |        |        |        |
|----|-------|-------|-------|-------|--------|--------|--------|
| 10 | 0.020 | 0.015 | 0.015 | 0.011 | -0.005 | -0.005 | -0.009 |
| 11 | 0.021 | 0.015 | 0.015 | 0.012 | -0.007 | -0.006 | -0.010 |
| 12 | 0.029 | 0.020 | 0.022 | 0.017 | -0.009 | -0.007 | -0.012 |
| 13 | 0.030 | 0.023 | 0.023 | 0.017 | -0.008 | -0.007 | -0.013 |
| 14 | 0.023 | 0.018 | 0.019 | 0.015 | -0.005 | -0.004 | -0.008 |
| 15 | 0.028 | 0.021 | 0.023 | 0.018 | -0.008 | -0.005 | -0.010 |
| 16 | 0.034 | 0.028 | 0.030 | 0.023 | -0.005 | -0.004 | -0.011 |
| 17 | 0.026 | 0.025 | 0.025 | 0.020 | -0.001 | -0.001 | -0.006 |
| 18 | 0.027 | 0.023 | 0.023 | 0.020 | -0.004 | -0.004 | -0.007 |
| 19 | 0.037 | 0.030 | 0.033 | 0.024 | -0.007 | -0.005 | -0.013 |
| 20 | 0.029 | 0.033 | 0.034 | 0.025 | 0.004  | 0.006  | -0.004 |
| 21 | 0.027 | 0.028 | 0.028 | 0.021 | 0.001  | 0.001  | -0.006 |
| 22 | 0.038 | 0.031 | 0.032 | 0.025 | -0.008 | -0.006 | -0.014 |
| 23 | 0.044 | 0.038 | 0.040 | 0.029 | -0.006 | -0.004 | -0.015 |
| 24 | 0.033 | 0.035 | 0.037 | 0.027 | 0.002  | 0.004  | -0.006 |
| 25 | 0.038 | 0.031 | 0.033 | 0.024 | -0.007 | -0.005 | -0.014 |
| 26 | 0.049 | 0.038 | 0.042 | 0.033 | -0.010 | -0.007 | -0.016 |
| 27 | 0.048 | 0.042 | 0.041 | 0.036 | -0.006 | -0.007 | -0.012 |
| 28 | 0.041 | 0.037 | 0.031 | 0.033 | -0.004 | -0.010 | -0.008 |
| 29 | 0.044 | 0.038 | 0.038 | 0.034 | -0.006 | -0.006 | -0.011 |
| 30 | 0.048 | 0.044 | 0.043 | 0.039 | -0.003 | -0.005 | -0.009 |
| 31 | 0.047 | 0.045 | 0.037 | 0.046 | -0.001 | -0.009 | -0.001 |
| 32 | 0.049 | 0.048 | 0.035 | 0.045 | -0.001 | -0.014 | -0.004 |
| 33 | 0.049 | 0.052 | 0.036 | 0.051 | 0.004  | -0.013 | 0.002  |
| 34 | 0.054 | 0.055 | 0.039 | 0.058 | 0.001  | -0.015 | 0.004  |
| 35 | 0.055 | 0.058 | 0.043 | 0.057 | 0.003  | -0.012 | 0.002  |
| 36 | 0.054 | 0.059 | 0.053 | 0.053 | 0.005  | -0.001 | -0.001 |
| 37 | 0.049 | 0.058 | 0.050 | 0.055 | 0.009  | 0.001  | 0.006  |
| 38 | 0.046 | 0.056 | 0.040 | 0.052 | 0.010  | -0.006 | 0.006  |
| 39 | 0.042 | 0.053 | 0.029 | 0.058 | 0.011  | -0.014 | 0.016  |
| 40 | 0.036 | 0.047 | 0.025 | 0.052 | 0.011  | -0.011 | 0.016  |
| 41 | 0.032 | 0.043 | 0.030 | 0.046 | 0.011  | -0.002 | 0.014  |
| 42 | 0.026 | 0.039 | 0.032 | 0.048 | 0.013  | 0.006  | 0.023  |

|    |       |       |       |       |       |       |       |
|----|-------|-------|-------|-------|-------|-------|-------|
| 43 | 0.020 | 0.032 | 0.032 | 0.044 | 0.012 | 0.012 | 0.023 |
| 44 | 0.019 | 0.034 | 0.032 | 0.047 | 0.015 | 0.013 | 0.028 |
| 45 | 0.014 | 0.028 | 0.029 | 0.041 | 0.014 | 0.015 | 0.027 |
| 46 | 0.015 | 0.031 | 0.023 | 0.044 | 0.016 | 0.007 | 0.029 |
| 47 | 0.013 | 0.031 | 0.024 | 0.041 | 0.017 | 0.011 | 0.027 |
| 48 | 0.013 | 0.033 | 0.018 | 0.041 | 0.021 | 0.005 | 0.029 |
| 49 | 0.011 | 0.027 | 0.018 | 0.033 | 0.016 | 0.007 | 0.022 |
| 50 | 0.010 | 0.023 | 0.015 | 0.033 | 0.013 | 0.005 | 0.023 |
| 51 | 0.012 | 0.020 | 0.014 | 0.030 | 0.009 | 0.003 | 0.018 |
| 52 | 0.009 | 0.021 | 0.014 | 0.034 | 0.011 | 0.005 | 0.024 |
| 53 | 0.010 | 0.020 | 0.020 | 0.028 | 0.010 | 0.010 | 0.018 |
| 54 | 0.011 | 0.027 | 0.023 | 0.036 | 0.016 | 0.012 | 0.025 |
| 55 | 0.009 | 0.025 | 0.023 | 0.027 | 0.016 | 0.014 | 0.017 |
| 56 | 0.008 | 0.022 | 0.022 | 0.025 | 0.014 | 0.014 | 0.017 |
| 57 | 0.010 | 0.029 | 0.023 | 0.025 | 0.019 | 0.013 | 0.015 |
| 58 | 0.010 | 0.028 | 0.025 | 0.034 | 0.018 | 0.016 | 0.024 |
| 59 | 0.008 | 0.022 | 0.023 | 0.029 | 0.014 | 0.016 | 0.021 |
| 60 | 0.007 | 0.021 | 0.023 | 0.027 | 0.014 | 0.016 | 0.020 |
| 61 | 0.009 | 0.025 | 0.026 | 0.032 | 0.016 | 0.017 | 0.023 |
| 62 | 0.010 | 0.027 | 0.027 | 0.033 | 0.018 | 0.017 | 0.023 |
| 63 | 0.008 | 0.022 | 0.023 | 0.029 | 0.014 | 0.015 | 0.021 |
| 64 | 0.007 | 0.018 | 0.020 | 0.023 | 0.011 | 0.014 | 0.017 |
| 65 | 0.008 | 0.020 | 0.023 | 0.027 | 0.012 | 0.015 | 0.019 |
| 66 | 0.009 | 0.021 | 0.023 | 0.028 | 0.013 | 0.014 | 0.019 |
| 67 | 0.006 | 0.016 | 0.017 | 0.022 | 0.010 | 0.010 | 0.015 |
| 68 | 0.006 | 0.014 | 0.016 | 0.020 | 0.008 | 0.010 | 0.014 |
| 69 | 0.009 | 0.018 | 0.020 | 0.025 | 0.009 | 0.011 | 0.016 |
| 70 | 0.009 | 0.016 | 0.017 | 0.023 | 0.008 | 0.009 | 0.014 |
| 71 | 0.007 | 0.016 | 0.015 | 0.021 | 0.008 | 0.008 | 0.014 |
| 72 | 0.009 | 0.018 | 0.020 | 0.023 | 0.009 | 0.010 | 0.014 |
| 73 | 0.012 | 0.020 | 0.020 | 0.026 | 0.008 | 0.008 | 0.014 |
| 74 | 0.017 | 0.026 | 0.024 | 0.034 | 0.009 | 0.006 | 0.016 |
| 75 | 0.014 | 0.025 | 0.025 | 0.034 | 0.011 | 0.010 | 0.019 |

|     |       |       |       |       |        |        |        |
|-----|-------|-------|-------|-------|--------|--------|--------|
| 76  | 0.019 | 0.030 | 0.027 | 0.041 | 0.011  | 0.008  | 0.022  |
| 77  | 0.017 | 0.030 | 0.028 | 0.042 | 0.012  | 0.011  | 0.025  |
| 78  | 0.014 | 0.028 | 0.029 | 0.040 | 0.014  | 0.015  | 0.026  |
| 79  | 0.015 | 0.030 | 0.028 | 0.044 | 0.015  | 0.013  | 0.028  |
| 80  | 0.015 | 0.030 | 0.028 | 0.045 | 0.015  | 0.013  | 0.030  |
| 81  | 0.015 | 0.032 | 0.033 | 0.048 | 0.017  | 0.018  | 0.033  |
| 82  | 0.014 | 0.030 | 0.032 | 0.046 | 0.016  | 0.018  | 0.032  |
| 83  | 0.014 | 0.034 | 0.036 | 0.049 | 0.020  | 0.022  | 0.035  |
| 84  | 0.012 | 0.034 | 0.032 | 0.046 | 0.022  | 0.020  | 0.034  |
| 85  | 0.013 | 0.035 | 0.033 | 0.046 | 0.022  | 0.019  | 0.032  |
| 86  | 0.014 | 0.035 | 0.023 | 0.043 | 0.021  | 0.009  | 0.029  |
| 87  | 0.015 | 0.036 | 0.026 | 0.045 | 0.021  | 0.011  | 0.031  |
| 88  | 0.014 | 0.031 | 0.024 | 0.045 | 0.017  | 0.011  | 0.031  |
| 89  | 0.016 | 0.033 | 0.024 | 0.046 | 0.017  | 0.008  | 0.030  |
| 90  | 0.015 | 0.029 | 0.029 | 0.040 | 0.014  | 0.014  | 0.026  |
| 91  | 0.018 | 0.033 | 0.030 | 0.045 | 0.015  | 0.012  | 0.027  |
| 92  | 0.017 | 0.030 | 0.033 | 0.041 | 0.013  | 0.016  | 0.024  |
| 93  | 0.021 | 0.034 | 0.035 | 0.047 | 0.012  | 0.014  | 0.026  |
| 94  | 0.022 | 0.032 | 0.034 | 0.045 | 0.010  | 0.012  | 0.023  |
| 95  | 0.025 | 0.036 | 0.031 | 0.043 | 0.011  | 0.006  | 0.018  |
| 96  | 0.035 | 0.042 | 0.024 | 0.042 | 0.007  | -0.011 | 0.007  |
| 97  | 0.038 | 0.037 | 0.029 | 0.032 | -0.001 | -0.008 | -0.005 |
| 98  | 0.026 | 0.034 | 0.029 | 0.037 | 0.008  | 0.003  | 0.011  |
| 99  | 0.026 | 0.030 | 0.026 | 0.037 | 0.004  | 0.001  | 0.011  |
| 100 | 0.027 | 0.033 | 0.028 | 0.040 | 0.006  | 0.001  | 0.014  |
| 101 | 0.023 | 0.029 | 0.024 | 0.034 | 0.005  | 0.000  | 0.010  |
| 102 | 0.017 | 0.021 | 0.020 | 0.028 | 0.004  | 0.004  | 0.012  |
| 103 | 0.017 | 0.025 | 0.023 | 0.034 | 0.007  | 0.006  | 0.016  |
| 104 | 0.017 | 0.025 | 0.023 | 0.033 | 0.008  | 0.007  | 0.017  |
| 105 | 0.013 | 0.020 | 0.021 | 0.028 | 0.007  | 0.009  | 0.015  |
| 106 | 0.010 | 0.017 | 0.019 | 0.024 | 0.007  | 0.009  | 0.014  |
| 107 | 0.011 | 0.019 | 0.023 | 0.025 | 0.009  | 0.012  | 0.015  |
| 108 | 0.010 | 0.019 | 0.022 | 0.025 | 0.009  | 0.012  | 0.015  |

|     |       |       |       |       |       |       |       |
|-----|-------|-------|-------|-------|-------|-------|-------|
| 109 | 0.006 | 0.013 | 0.016 | 0.018 | 0.007 | 0.009 | 0.012 |
| 110 | 0.006 | 0.014 | 0.018 | 0.019 | 0.008 | 0.011 | 0.013 |
| 111 | 0.008 | 0.018 | 0.022 | 0.024 | 0.010 | 0.014 | 0.016 |
| 112 | 0.006 | 0.015 | 0.018 | 0.020 | 0.009 | 0.011 | 0.013 |
| 113 | 0.004 | 0.010 | 0.014 | 0.015 | 0.006 | 0.010 | 0.011 |
| 114 | 0.006 | 0.016 | 0.019 | 0.021 | 0.010 | 0.013 | 0.016 |
| 115 | 0.007 | 0.018 | 0.019 | 0.022 | 0.011 | 0.012 | 0.015 |
| 116 | 0.004 | 0.013 | 0.015 | 0.016 | 0.009 | 0.011 | 0.012 |
| 117 | 0.004 | 0.013 | 0.016 | 0.018 | 0.009 | 0.012 | 0.014 |
| 118 | 0.007 | 0.018 | 0.022 | 0.024 | 0.011 | 0.016 | 0.018 |
| 119 | 0.007 | 0.017 | 0.019 | 0.024 | 0.010 | 0.012 | 0.018 |
| 120 | 0.007 | 0.016 | 0.018 | 0.022 | 0.008 | 0.011 | 0.015 |
| 121 | 0.008 | 0.016 | 0.016 | 0.025 | 0.007 | 0.008 | 0.017 |
| 122 | 0.010 | 0.023 | 0.021 | 0.030 | 0.013 | 0.011 | 0.020 |
| 123 | 0.009 | 0.020 | 0.020 | 0.027 | 0.011 | 0.011 | 0.018 |
| 124 | 0.009 | 0.017 | 0.014 | 0.026 | 0.008 | 0.005 | 0.017 |
| 125 | 0.013 | 0.023 | 0.015 | 0.032 | 0.011 | 0.002 | 0.019 |
| 126 | 0.014 | 0.026 | 0.018 | 0.032 | 0.012 | 0.004 | 0.018 |
| 127 | 0.013 | 0.026 | 0.025 | 0.035 | 0.014 | 0.012 | 0.023 |
| 128 | 0.015 | 0.031 | 0.027 | 0.040 | 0.016 | 0.011 | 0.024 |
| 129 | 0.014 | 0.026 | 0.029 | 0.038 | 0.012 | 0.015 | 0.025 |
| 130 | 0.017 | 0.032 | 0.033 | 0.043 | 0.015 | 0.016 | 0.026 |
| 131 | 0.022 | 0.035 | 0.040 | 0.044 | 0.014 | 0.018 | 0.022 |
| 132 | 0.026 | 0.041 | 0.043 | 0.046 | 0.015 | 0.017 | 0.020 |
| 133 | 0.033 | 0.049 | 0.055 | 0.057 | 0.015 | 0.022 | 0.024 |
| 134 | 0.036 | 0.052 | 0.055 | 0.061 | 0.016 | 0.019 | 0.025 |
| 135 | 0.034 | 0.051 | 0.046 | 0.063 | 0.017 | 0.011 | 0.029 |
| 136 | 0.029 | 0.048 | 0.037 | 0.056 | 0.019 | 0.007 | 0.026 |
| 137 | 0.032 | 0.046 | 0.035 | 0.055 | 0.014 | 0.003 | 0.023 |
| 138 | 0.027 | 0.040 | 0.028 | 0.049 | 0.013 | 0.002 | 0.022 |
| 139 | 0.021 | 0.036 | 0.026 | 0.044 | 0.015 | 0.006 | 0.023 |
| 140 | 0.018 | 0.031 | 0.025 | 0.037 | 0.013 | 0.007 | 0.019 |
| 141 | 0.015 | 0.029 | 0.024 | 0.034 | 0.015 | 0.009 | 0.019 |

|     |       |       |       |       |       |       |       |
|-----|-------|-------|-------|-------|-------|-------|-------|
| 142 | 0.012 | 0.022 | 0.021 | 0.028 | 0.010 | 0.009 | 0.016 |
| 143 | 0.010 | 0.020 | 0.020 | 0.026 | 0.011 | 0.010 | 0.016 |
| 144 | 0.008 | 0.016 | 0.017 | 0.022 | 0.009 | 0.009 | 0.014 |
| 145 | 0.007 | 0.015 | 0.015 | 0.021 | 0.008 | 0.008 | 0.014 |
| 146 | 0.005 | 0.012 | 0.013 | 0.017 | 0.007 | 0.008 | 0.012 |
| 147 | 0.006 | 0.014 | 0.015 | 0.019 | 0.008 | 0.009 | 0.013 |
| 148 | 0.005 | 0.013 | 0.015 | 0.018 | 0.007 | 0.010 | 0.012 |
| 149 | 0.007 | 0.016 | 0.017 | 0.021 | 0.009 | 0.010 | 0.014 |
| 150 | 0.008 | 0.018 | 0.018 | 0.024 | 0.010 | 0.010 | 0.017 |
| 151 | 0.011 | 0.023 | 0.023 | 0.029 | 0.012 | 0.012 | 0.018 |
| 152 | 0.010 | 0.023 | 0.022 | 0.028 | 0.012 | 0.012 | 0.018 |
| 153 | 0.008 | 0.019 | 0.018 | 0.023 | 0.010 | 0.010 | 0.015 |
| 154 | 0.010 | 0.021 | 0.021 | 0.027 | 0.012 | 0.011 | 0.017 |
| 155 | 0.012 | 0.024 | 0.025 | 0.028 | 0.013 | 0.013 | 0.017 |
| 156 | 0.009 | 0.020 | 0.022 | 0.024 | 0.011 | 0.012 | 0.015 |
| 157 | 0.009 | 0.019 | 0.020 | 0.025 | 0.010 | 0.011 | 0.015 |
| 158 | 0.012 | 0.024 | 0.025 | 0.030 | 0.012 | 0.013 | 0.018 |
| 159 | 0.012 | 0.026 | 0.027 | 0.030 | 0.013 | 0.015 | 0.017 |
| 160 | 0.010 | 0.020 | 0.022 | 0.025 | 0.010 | 0.012 | 0.016 |
| 161 | 0.009 | 0.019 | 0.020 | 0.024 | 0.009 | 0.010 | 0.014 |
| 162 | 0.013 | 0.024 | 0.024 | 0.029 | 0.011 | 0.011 | 0.016 |
| 163 | 0.016 | 0.029 | 0.031 | 0.033 | 0.013 | 0.015 | 0.017 |
| 164 | 0.014 | 0.026 | 0.027 | 0.031 | 0.012 | 0.013 | 0.018 |
| 165 | 0.014 | 0.025 | 0.025 | 0.027 | 0.010 | 0.011 | 0.013 |
| 166 | 0.019 | 0.030 | 0.030 | 0.031 | 0.011 | 0.011 | 0.012 |
| 167 | 0.020 | 0.033 | 0.030 | 0.036 | 0.013 | 0.010 | 0.015 |
| 168 | 0.018 | 0.028 | 0.026 | 0.032 | 0.010 | 0.008 | 0.015 |
| 169 | 0.021 | 0.030 | 0.029 | 0.030 | 0.009 | 0.008 | 0.009 |
| 170 | 0.022 | 0.030 | 0.031 | 0.031 | 0.008 | 0.009 | 0.009 |
| 171 | 0.026 | 0.036 | 0.038 | 0.040 | 0.010 | 0.012 | 0.014 |
| 172 | 0.023 | 0.037 | 0.038 | 0.043 | 0.013 | 0.014 | 0.020 |
| 173 | 0.024 | 0.040 | 0.036 | 0.048 | 0.015 | 0.011 | 0.024 |
| 174 | 0.020 | 0.039 | 0.039 | 0.051 | 0.019 | 0.019 | 0.031 |

|     |       |       |       |       |       |       |       |
|-----|-------|-------|-------|-------|-------|-------|-------|
| 175 | 0.018 | 0.039 | 0.039 | 0.051 | 0.021 | 0.021 | 0.033 |
| 176 | 0.018 | 0.040 | 0.040 | 0.051 | 0.022 | 0.022 | 0.033 |
| 177 | 0.016 | 0.037 | 0.037 | 0.049 | 0.021 | 0.021 | 0.033 |
| 178 | 0.017 | 0.038 | 0.036 | 0.044 | 0.021 | 0.019 | 0.027 |
| 179 | 0.018 | 0.034 | 0.030 | 0.035 | 0.016 | 0.012 | 0.017 |
| 180 | 0.015 | 0.032 | 0.032 | 0.021 | 0.017 | 0.017 | 0.006 |
| 181 | 0.012 | 0.031 | 0.028 | 0.027 | 0.019 | 0.017 | 0.016 |
| 182 | 0.009 | 0.026 | 0.023 | 0.026 | 0.017 | 0.014 | 0.018 |
| 183 | 0.009 | 0.023 | 0.021 | 0.026 | 0.014 | 0.012 | 0.017 |
| 184 | 0.007 | 0.013 | 0.016 | 0.017 | 0.006 | 0.009 | 0.010 |
| 185 | 0.007 | 0.017 | 0.011 | 0.018 | 0.010 | 0.003 | 0.011 |
| 186 | 0.005 | 0.015 | 0.017 | 0.015 | 0.010 | 0.012 | 0.010 |
| 187 | 0.005 | 0.013 | 0.018 | 0.015 | 0.008 | 0.013 | 0.010 |
| 188 | 0.004 | 0.010 | 0.014 | 0.012 | 0.006 | 0.011 | 0.009 |
| 189 | 0.003 | 0.008 | 0.012 | 0.011 | 0.005 | 0.009 | 0.008 |
| 190 | 0.003 | 0.008 | 0.011 | 0.010 | 0.005 | 0.008 | 0.007 |
| 191 | 0.002 | 0.005 | 0.007 | 0.006 | 0.003 | 0.006 | 0.005 |
| 192 | 0.002 | 0.004 | 0.007 | 0.006 | 0.003 | 0.005 | 0.004 |
| 193 | 0.002 | 0.005 | 0.008 | 0.006 | 0.003 | 0.006 | 0.005 |
| 194 | 0.001 | 0.004 | 0.006 | 0.005 | 0.003 | 0.005 | 0.004 |
| 195 | 0.001 | 0.003 | 0.005 | 0.004 | 0.002 | 0.004 | 0.003 |
| 196 | 0.001 | 0.002 | 0.005 | 0.003 | 0.002 | 0.004 | 0.003 |
| 197 | 0.001 | 0.003 | 0.005 | 0.004 | 0.002 | 0.005 | 0.003 |
| 198 | 0.001 | 0.004 | 0.007 | 0.006 | 0.003 | 0.005 | 0.005 |
| 199 | 0.002 | 0.006 | 0.009 | 0.009 | 0.004 | 0.008 | 0.007 |
| 200 | 0.002 | 0.008 | 0.013 | 0.012 | 0.006 | 0.010 | 0.010 |
| 201 | 0.002 | 0.007 | 0.012 | 0.011 | 0.005 | 0.010 | 0.009 |
| 202 | 0.001 | 0.005 | 0.009 | 0.007 | 0.004 | 0.008 | 0.006 |
| 203 | 0.002 | 0.007 | 0.011 | 0.009 | 0.005 | 0.009 | 0.007 |
| 204 | 0.002 | 0.009 | 0.014 | 0.012 | 0.006 | 0.011 | 0.009 |
| 205 | 0.002 | 0.007 | 0.011 | 0.009 | 0.005 | 0.009 | 0.007 |
| 206 | 0.002 | 0.006 | 0.009 | 0.007 | 0.004 | 0.008 | 0.005 |
| 207 | 0.002 | 0.008 | 0.010 | 0.009 | 0.006 | 0.008 | 0.007 |



|     |       |       |       |       |        |       |       |
|-----|-------|-------|-------|-------|--------|-------|-------|
| 208 | 0.002 | 0.008 | 0.013 | 0.010 | 0.006  | 0.011 | 0.007 |
| 209 | 0.002 | 0.006 | 0.009 | 0.006 | 0.004  | 0.007 | 0.005 |
| 210 | 0.002 | 0.006 | 0.007 | 0.006 | 0.004  | 0.005 | 0.004 |
| 211 | 0.003 | 0.009 | 0.011 | 0.008 | 0.006  | 0.008 | 0.006 |
| 212 | 0.002 | 0.008 | 0.011 | 0.009 | 0.006  | 0.008 | 0.006 |
| 213 | 0.003 | 0.008 | 0.010 | 0.008 | 0.006  | 0.007 | 0.006 |
| 214 | 0.002 | 0.006 | 0.007 | 0.006 | 0.004  | 0.004 | 0.004 |
| 215 | 0.002 | 0.005 | 0.004 | 0.005 | 0.003  | 0.003 | 0.003 |
| 216 | 0.001 | 0.003 | 0.003 | 0.003 | 0.002  | 0.002 | 0.002 |
| 217 | 0.001 | 0.002 | 0.002 | 0.003 | 0.001  | 0.001 | 0.002 |
| 218 | 0.001 | 0.001 | 0.002 | 0.002 | 0.001  | 0.002 | 0.001 |
| 219 | 0.000 | 0.001 | 0.001 | 0.001 | 0.001  | 0.001 | 0.001 |
| 220 | 0.000 | 0.001 | 0.001 | 0.001 | 0.000  | 0.001 | 0.001 |
| 221 | 0.000 | 0.001 | 0.000 | 0.001 | 0.000  | 0.000 | 0.001 |
| 222 | 0.000 | 0.001 | 0.000 | 0.001 | 0.000  | 0.000 | 0.001 |
| 223 | 0.000 | 0.000 | 0.000 | 0.000 | 0.000  | 0.000 | 0.000 |
| 224 | 0.000 | 0.000 | 0.000 | 0.000 | 0.000  | 0.000 | 0.000 |
| 225 | 0.000 | 0.000 | 0.000 | 0.000 | 0.000  | 0.000 | 0.000 |
| 226 | 0.000 | 0.000 | 0.000 | 0.000 | 0.000  | 0.000 | 0.000 |
| 227 | 0.000 | 0.000 | 0.000 | 0.000 | 0.000  | 0.000 | 0.000 |
| 228 | 0.000 | 0.000 | 0.000 | 0.000 | 0.000  | 0.000 | 0.000 |
| 229 | 0.000 | 0.000 | 0.000 | 0.000 | 0.000  | 0.000 | 0.000 |
| 230 | 0.000 | 0.000 | 0.000 | 0.000 | 0.000  | 0.000 | 0.000 |
| 231 | 0.000 | 0.001 | 0.001 | 0.001 | 0.000  | 0.001 | 0.001 |
| 232 | 0.000 | 0.000 | 0.001 | 0.001 | 0.000  | 0.001 | 0.001 |
| 233 | 0.001 | 0.001 | 0.002 | 0.002 | 0.000  | 0.001 | 0.001 |
| 234 | 0.001 | 0.002 | 0.003 | 0.002 | 0.001  | 0.002 | 0.001 |
| 235 | 0.001 | 0.002 | 0.003 | 0.004 | 0.001  | 0.002 | 0.002 |
| 236 | 0.001 | 0.002 | 0.004 | 0.004 | 0.001  | 0.003 | 0.003 |
| 237 | 0.002 | 0.001 | 0.004 | 0.005 | -0.001 | 0.003 | 0.004 |
| 238 | 0.002 | 0.001 | 0.005 | 0.007 | -0.001 | 0.003 | 0.004 |
| 239 | 0.003 | 0.001 | 0.009 | 0.009 | -0.002 | 0.006 | 0.006 |
| 240 | 0.003 | 0.003 | 0.007 | 0.009 | -0.001 | 0.004 | 0.006 |

|     |       |       |       |       |        |       |       |
|-----|-------|-------|-------|-------|--------|-------|-------|
| 241 | 0.005 | 0.001 | 0.010 | 0.011 | -0.004 | 0.005 | 0.006 |
| 242 | 0.005 | 0.003 | 0.012 | 0.011 | -0.002 | 0.008 | 0.006 |
| 243 | 0.004 | 0.004 | 0.015 | 0.011 | 0.000  | 0.010 | 0.007 |
| 244 | 0.003 | 0.005 | 0.010 | 0.007 | 0.002  | 0.007 | 0.005 |
| 245 | 0.003 | 0.006 | 0.010 | 0.007 | 0.003  | 0.007 | 0.004 |
| 246 | 0.003 | 0.008 | 0.009 | 0.008 | 0.005  | 0.006 | 0.005 |
| 247 | 0.002 | 0.008 | 0.009 | 0.007 | 0.005  | 0.007 | 0.005 |
| 248 | 0.002 | 0.005 | 0.007 | 0.005 | 0.004  | 0.005 | 0.003 |
| 249 | 0.002 | 0.006 | 0.008 | 0.006 | 0.004  | 0.007 | 0.004 |
| 250 | 0.001 | 0.004 | 0.007 | 0.005 | 0.003  | 0.006 | 0.003 |
| 251 | 0.001 | 0.004 | 0.007 | 0.005 | 0.003  | 0.006 | 0.004 |
| 252 | 0.001 | 0.003 | 0.006 | 0.005 | 0.002  | 0.004 | 0.004 |
| 253 | 0.001 | 0.002 | 0.005 | 0.005 | 0.001  | 0.004 | 0.004 |
| 254 | 0.001 | 0.002 | 0.004 | 0.005 | 0.001  | 0.003 | 0.004 |
| 255 | 0.001 | 0.002 | 0.004 | 0.003 | 0.001  | 0.003 | 0.003 |
| 256 | 0.000 | 0.001 | 0.002 | 0.003 | 0.001  | 0.002 | 0.002 |
| 257 | 0.000 | 0.002 | 0.003 | 0.003 | 0.001  | 0.002 | 0.003 |
| 258 | 0.001 | 0.002 | 0.004 | 0.003 | 0.001  | 0.003 | 0.003 |
| 259 | 0.001 | 0.002 | 0.005 | 0.004 | 0.002  | 0.004 | 0.003 |
| 260 | 0.001 | 0.003 | 0.005 | 0.004 | 0.002  | 0.004 | 0.003 |
| 261 | 0.001 | 0.004 | 0.006 | 0.004 | 0.002  | 0.005 | 0.003 |
| 262 | 0.002 | 0.005 | 0.008 | 0.006 | 0.004  | 0.006 | 0.004 |
| 263 | 0.002 | 0.006 | 0.008 | 0.006 | 0.004  | 0.006 | 0.004 |
| 264 | 0.002 | 0.004 | 0.006 | 0.005 | 0.003  | 0.005 | 0.003 |
| 265 | 0.002 | 0.006 | 0.008 | 0.007 | 0.004  | 0.006 | 0.005 |
| 266 | 0.003 | 0.008 | 0.011 | 0.010 | 0.005  | 0.008 | 0.007 |
| 267 | 0.003 | 0.010 | 0.013 | 0.012 | 0.007  | 0.010 | 0.008 |
| 268 | 0.004 | 0.012 | 0.015 | 0.012 | 0.009  | 0.012 | 0.009 |
| 269 | 0.004 | 0.014 | 0.016 | 0.015 | 0.010  | 0.012 | 0.010 |
| 270 | 0.006 | 0.017 | 0.018 | 0.018 | 0.011  | 0.012 | 0.012 |
| 271 | 0.009 | 0.022 | 0.021 | 0.024 | 0.013  | 0.012 | 0.015 |
| 272 | 0.012 | 0.028 | 0.025 | 0.031 | 0.016  | 0.013 | 0.019 |
| 273 | 0.011 | 0.029 | 0.028 | 0.034 | 0.017  | 0.017 | 0.023 |

|     |       |       |       |       |       |        |       |
|-----|-------|-------|-------|-------|-------|--------|-------|
| 274 | 0.014 | 0.032 | 0.035 | 0.038 | 0.018 | 0.020  | 0.023 |
| 275 | 0.014 | 0.030 | 0.033 | 0.036 | 0.016 | 0.018  | 0.022 |
| 276 | 0.017 | 0.039 | 0.037 | 0.040 | 0.022 | 0.020  | 0.023 |
| 277 | 0.015 | 0.037 | 0.036 | 0.045 | 0.021 | 0.021  | 0.030 |
| 278 | 0.014 | 0.034 | 0.030 | 0.036 | 0.019 | 0.016  | 0.022 |
| 279 | 0.013 | 0.031 | 0.028 | 0.037 | 0.018 | 0.015  | 0.023 |
| 280 | 0.011 | 0.025 | 0.025 | 0.032 | 0.014 | 0.014  | 0.020 |
| 281 | 0.012 | 0.023 | 0.022 | 0.028 | 0.012 | 0.010  | 0.017 |
| 282 | 0.011 | 0.021 | 0.020 | 0.025 | 0.010 | 0.009  | 0.014 |
| 283 | 0.009 | 0.020 | 0.020 | 0.026 | 0.010 | 0.010  | 0.017 |
| 284 | 0.008 | 0.018 | 0.019 | 0.024 | 0.010 | 0.011  | 0.016 |
| 285 | 0.009 | 0.021 | 0.021 | 0.028 | 0.012 | 0.012  | 0.019 |
| 286 | 0.011 | 0.023 | 0.023 | 0.030 | 0.013 | 0.013  | 0.020 |
| 287 | 0.012 | 0.027 | 0.024 | 0.034 | 0.015 | 0.012  | 0.021 |
| 288 | 0.016 | 0.032 | 0.027 | 0.040 | 0.016 | 0.011  | 0.025 |
| 289 | 0.018 | 0.035 | 0.028 | 0.046 | 0.017 | 0.010  | 0.028 |
| 290 | 0.020 | 0.039 | 0.027 | 0.048 | 0.019 | 0.007  | 0.028 |
| 291 | 0.022 | 0.040 | 0.035 | 0.048 | 0.018 | 0.013  | 0.026 |
| 292 | 0.025 | 0.044 | 0.044 | 0.051 | 0.018 | 0.019  | 0.025 |
| 293 | 0.029 | 0.043 | 0.045 | 0.047 | 0.015 | 0.017  | 0.018 |
| 294 | 0.026 | 0.039 | 0.042 | 0.043 | 0.013 | 0.015  | 0.017 |
| 295 | 0.030 | 0.043 | 0.045 | 0.047 | 0.013 | 0.014  | 0.017 |
| 296 | 0.033 | 0.040 | 0.036 | 0.044 | 0.006 | 0.003  | 0.010 |
| 297 | 0.034 | 0.039 | 0.037 | 0.044 | 0.006 | 0.003  | 0.010 |
| 298 | 0.038 | 0.041 | 0.037 | 0.044 | 0.003 | 0.000  | 0.006 |
| 299 | 0.038 | 0.044 | 0.036 | 0.049 | 0.005 | -0.002 | 0.011 |
| 300 | 0.038 | 0.041 | 0.032 | 0.044 | 0.003 | -0.006 | 0.005 |
| 301 | 0.033 | 0.036 | 0.033 | 0.036 | 0.003 | 0.000  | 0.003 |
| 302 | 0.028 | 0.035 | 0.033 | 0.039 | 0.008 | 0.005  | 0.011 |
| 303 | 0.028 | 0.037 | 0.032 | 0.042 | 0.009 | 0.004  | 0.014 |
| 304 | 0.027 | 0.032 | 0.031 | 0.033 | 0.006 | 0.004  | 0.006 |
| 305 | 0.023 | 0.030 | 0.028 | 0.030 | 0.006 | 0.005  | 0.006 |
| 306 | 0.021 | 0.031 | 0.027 | 0.033 | 0.010 | 0.006  | 0.012 |

|     |       |       |       |       |       |        |        |
|-----|-------|-------|-------|-------|-------|--------|--------|
| 307 | 0.020 | 0.027 | 0.025 | 0.029 | 0.007 | 0.005  | 0.009  |
| 308 | 0.018 | 0.023 | 0.023 | 0.025 | 0.005 | 0.005  | 0.007  |
| 309 | 0.016 | 0.023 | 0.021 | 0.028 | 0.007 | 0.005  | 0.012  |
| 310 | 0.015 | 0.023 | 0.021 | 0.026 | 0.008 | 0.006  | 0.012  |
| 311 | 0.013 | 0.020 | 0.019 | 0.022 | 0.007 | 0.007  | 0.010  |
| 312 | 0.010 | 0.015 | 0.015 | 0.018 | 0.005 | 0.005  | 0.008  |
| 313 | 0.009 | 0.016 | 0.016 | 0.020 | 0.007 | 0.007  | 0.011  |
| 314 | 0.009 | 0.017 | 0.016 | 0.020 | 0.008 | 0.007  | 0.011  |
| 315 | 0.006 | 0.012 | 0.012 | 0.014 | 0.006 | 0.006  | 0.008  |
| 316 | 0.006 | 0.012 | 0.012 | 0.013 | 0.006 | 0.006  | 0.007  |
| 317 | 0.007 | 0.015 | 0.014 | 0.016 | 0.008 | 0.007  | 0.009  |
| 318 | 0.006 | 0.013 | 0.012 | 0.014 | 0.007 | 0.007  | 0.008  |
| 319 | 0.005 | 0.012 | 0.012 | 0.013 | 0.007 | 0.007  | 0.008  |
| 320 | 0.005 | 0.012 | 0.014 | 0.014 | 0.007 | 0.009  | 0.009  |
| 321 | 0.007 | 0.015 | 0.015 | 0.018 | 0.008 | 0.008  | 0.011  |
| 322 | 0.009 | 0.017 | 0.018 | 0.019 | 0.008 | 0.009  | 0.010  |
| 323 | 0.012 | 0.021 | 0.020 | 0.024 | 0.009 | 0.008  | 0.012  |
| 324 | 0.015 | 0.025 | 0.023 | 0.028 | 0.010 | 0.008  | 0.013  |
| 325 | 0.019 | 0.029 | 0.026 | 0.033 | 0.011 | 0.007  | 0.014  |
| 326 | 0.020 | 0.032 | 0.029 | 0.035 | 0.011 | 0.009  | 0.015  |
| 327 | 0.025 | 0.038 | 0.035 | 0.042 | 0.013 | 0.010  | 0.017  |
| 328 | 0.029 | 0.041 | 0.031 | 0.048 | 0.011 | 0.001  | 0.018  |
| 329 | 0.039 | 0.049 | 0.030 | 0.060 | 0.010 | -0.009 | 0.021  |
| 330 | 0.037 | 0.046 | 0.036 | 0.060 | 0.008 | -0.002 | 0.022  |
| 331 | 0.037 | 0.045 | 0.029 | 0.054 | 0.008 | -0.007 | 0.017  |
| 332 | 0.045 | 0.053 | 0.020 | 0.058 | 0.008 | -0.025 | 0.013  |
| 333 | 0.047 | 0.054 | 0.018 | 0.059 | 0.007 | -0.029 | 0.012  |
| 334 | 0.043 | 0.047 | 0.021 | 0.054 | 0.004 | -0.022 | 0.011  |
| 335 | 0.044 | 0.049 | 0.020 | 0.053 | 0.005 | -0.025 | 0.009  |
| 336 | 0.053 | 0.058 | 0.029 | 0.058 | 0.006 | -0.024 | 0.005  |
| 337 | 0.053 | 0.055 | 0.017 | 0.048 | 0.003 | -0.035 | -0.005 |
| 338 | 0.048 | 0.049 | 0.041 | 0.040 | 0.002 | -0.006 | -0.008 |
| 339 | 0.049 | 0.050 | 0.042 | 0.044 | 0.001 | -0.007 | -0.005 |

|     |       |       |       |       |        |        |        |
|-----|-------|-------|-------|-------|--------|--------|--------|
| 340 | 0.060 | 0.054 | 0.042 | 0.044 | -0.006 | -0.018 | -0.016 |
| 341 | 0.055 | 0.051 | 0.046 | 0.039 | -0.004 | -0.009 | -0.016 |
| 342 | 0.050 | 0.046 | 0.046 | 0.039 | -0.004 | -0.005 | -0.012 |
| 343 | 0.056 | 0.048 | 0.046 | 0.044 | -0.008 | -0.011 | -0.013 |
| 344 | 0.061 | 0.038 | 0.043 | 0.044 | -0.022 | -0.018 | -0.017 |
| 345 | 0.048 | 0.042 | 0.042 | 0.040 | -0.006 | -0.007 | -0.008 |
| 346 | 0.051 | 0.043 | 0.042 | 0.038 | -0.008 | -0.009 | -0.013 |
| 347 | 0.060 | 0.049 | 0.047 | 0.042 | -0.011 | -0.013 | -0.018 |
| 348 | 0.030 | 0.043 | 0.045 | 0.040 | 0.013  | 0.015  | 0.009  |
| 349 | 0.051 | 0.042 | 0.041 | 0.036 | -0.010 | -0.010 | -0.015 |
| 350 | 0.056 | 0.041 | 0.043 | 0.036 | -0.015 | -0.013 | -0.020 |
| 351 | 0.049 | 0.045 | 0.048 | 0.038 | -0.004 | -0.001 | -0.011 |
| 352 | 0.058 | 0.040 | 0.040 | 0.032 | -0.018 | -0.018 | -0.026 |
| 353 | 0.049 | 0.033 | 0.039 | 0.028 | -0.016 | -0.010 | -0.021 |
| 354 | 0.055 | 0.035 | 0.043 | 0.029 | -0.021 | -0.012 | -0.027 |
| 355 | 0.052 | 0.037 | 0.044 | 0.030 | -0.014 | -0.008 | -0.022 |
| 356 | 0.041 | 0.031 | 0.035 | 0.022 | -0.010 | -0.006 | -0.019 |
| 357 | 0.039 | 0.029 | 0.035 | 0.021 | -0.010 | -0.004 | -0.018 |
| 358 | 0.043 | 0.030 | 0.037 | 0.022 | -0.013 | -0.006 | -0.021 |
| 359 | 0.039 | 0.030 | 0.037 | 0.023 | -0.009 | -0.001 | -0.016 |
| 360 | 0.034 | 0.025 | 0.027 | 0.017 | -0.009 | -0.007 | -0.017 |
| 361 | 0.035 | 0.026 | 0.027 | 0.017 | -0.010 | -0.008 | -0.018 |
| 362 | 0.032 | 0.026 | 0.027 | 0.017 | -0.007 | -0.006 | -0.016 |
| 363 | 0.032 | 0.022 | 0.025 | 0.017 | -0.010 | -0.007 | -0.015 |
| 364 | 0.038 | 0.026 | 0.031 | 0.020 | -0.012 | -0.007 | -0.017 |
| 365 | 0.043 | 0.030 | 0.036 | 0.023 | -0.013 | -0.007 | -0.020 |
| 366 | 0.043 | 0.031 | 0.034 | 0.022 | -0.012 | -0.008 | -0.021 |
| 367 | 0.043 | 0.030 | 0.034 | 0.023 | -0.012 | -0.008 | -0.020 |
| 368 | 0.053 | 0.024 | 0.042 | 0.028 | -0.029 | -0.011 | -0.025 |
| 369 | 0.052 | 0.034 | 0.040 | 0.028 | -0.018 | -0.012 | -0.024 |
| 370 | 0.048 | 0.039 | 0.039 | 0.026 | -0.009 | -0.009 | -0.022 |
| 371 | 0.054 | 0.039 | 0.044 | 0.028 | -0.015 | -0.011 | -0.026 |
| 372 | 0.059 | 0.043 | 0.046 | 0.034 | -0.016 | -0.013 | -0.025 |

|     |       |       |       |       |        |        |        |
|-----|-------|-------|-------|-------|--------|--------|--------|
| 373 | 0.051 | 0.040 | 0.040 | 0.029 | -0.010 | -0.010 | -0.022 |
| 374 | 0.044 | 0.037 | 0.039 | 0.027 | -0.006 | -0.004 | -0.016 |
| 375 | 0.050 | 0.042 | 0.049 | 0.034 | -0.008 | -0.002 | -0.016 |
| 376 | 0.036 | 0.046 | 0.050 | 0.037 | 0.011  | 0.015  | 0.001  |
| 377 | 0.040 | 0.041 | 0.044 | 0.032 | 0.001  | 0.004  | -0.009 |
| 378 | 0.049 | 0.041 | 0.043 | 0.030 | -0.008 | -0.006 | -0.019 |
| 379 | 0.061 | 0.047 | 0.051 | 0.036 | -0.014 | -0.010 | -0.025 |
| 380 | 0.060 | 0.047 | 0.052 | 0.038 | -0.014 | -0.009 | -0.022 |
| 381 | 0.053 | 0.040 | 0.044 | 0.033 | -0.014 | -0.010 | -0.021 |
| 382 | 0.055 | 0.042 | 0.047 | 0.034 | -0.014 | -0.008 | -0.021 |
| 383 | 0.058 | 0.050 | 0.043 | 0.039 | -0.008 | -0.015 | -0.019 |
| 384 | 0.049 | 0.044 | 0.046 | 0.035 | -0.005 | -0.004 | -0.014 |
| 385 | 0.046 | 0.040 | 0.041 | 0.031 | -0.006 | -0.005 | -0.015 |
| 386 | 0.050 | 0.045 | 0.039 | 0.034 | -0.004 | -0.011 | -0.015 |
| 387 | 0.049 | 0.046 | 0.037 | 0.038 | -0.003 | -0.012 | -0.011 |
| 388 | 0.053 | 0.050 | 0.034 | 0.041 | -0.003 | -0.019 | -0.012 |
| 389 | 0.055 | 0.052 | 0.024 | 0.047 | -0.003 | -0.031 | -0.008 |
| 390 | 0.064 | 0.052 | 0.046 | 0.048 | -0.012 | -0.018 | -0.016 |
| 391 | 0.063 | 0.056 | 0.039 | 0.054 | -0.007 | -0.024 | -0.009 |
| 392 | 0.068 | 0.058 | 0.031 | 0.060 | -0.009 | -0.036 | -0.008 |
| 393 | 0.068 | 0.062 | 0.043 | 0.057 | -0.007 | -0.025 | -0.011 |
| 394 | 0.071 | 0.058 | 0.064 | 0.051 | -0.013 | -0.007 | -0.020 |
| 395 | 0.057 | 0.055 | 0.063 | 0.054 | -0.001 | 0.007  | -0.003 |
| 396 | 0.026 | 0.059 | 0.053 | 0.019 | 0.033  | 0.027  | -0.007 |
| 397 | 0.041 | 0.060 | 0.055 | 0.011 | 0.019  | 0.014  | -0.030 |
| 398 | 0.030 | 0.056 | 0.053 | 0.022 | 0.026  | 0.023  | -0.008 |
| 399 | 0.050 | 0.055 | 0.053 | 0.023 | 0.006  | 0.003  | -0.027 |
| 400 | 0.055 | 0.050 | 0.049 | 0.014 | -0.005 | -0.006 | -0.041 |
| 401 | 0.064 | 0.041 | 0.047 | 0.010 | -0.023 | -0.016 | -0.054 |
| 402 | 0.069 | 0.050 | 0.049 | 0.020 | -0.019 | -0.020 | -0.049 |
| 403 | 0.070 | 0.049 | 0.050 | 0.018 | -0.021 | -0.019 | -0.051 |
| 404 | 0.072 | 0.008 | 0.050 | 0.013 | -0.064 | -0.022 | -0.059 |
| 405 | 0.063 | 0.023 | 0.047 | 0.026 | -0.040 | -0.016 | -0.036 |

|     |       |       |       |       |        |        |        |
|-----|-------|-------|-------|-------|--------|--------|--------|
| 406 | 0.060 | 0.023 | 0.049 | 0.041 | -0.036 | -0.010 | -0.019 |
| 407 | 0.063 | 0.030 | 0.050 | 0.038 | -0.034 | -0.014 | -0.025 |
| 408 | 0.056 | 0.038 | 0.045 | 0.039 | -0.018 | -0.012 | -0.017 |
| 409 | 0.050 | 0.036 | 0.045 | 0.033 | -0.014 | -0.005 | -0.017 |
| 410 | 0.050 | 0.031 | 0.048 | 0.030 | -0.019 | -0.002 | -0.020 |
| 411 | 0.051 | 0.034 | 0.047 | 0.029 | -0.016 | -0.003 | -0.021 |
| 412 | 0.043 | 0.034 | 0.040 | 0.027 | -0.009 | -0.003 | -0.016 |
| 413 | 0.041 | 0.032 | 0.037 | 0.024 | -0.010 | -0.004 | -0.017 |
| 414 | 0.040 | 0.028 | 0.036 | 0.025 | -0.012 | -0.004 | -0.015 |
| 415 | 0.038 | 0.028 | 0.033 | 0.023 | -0.010 | -0.006 | -0.015 |
| 416 | 0.032 | 0.023 | 0.028 | 0.019 | -0.009 | -0.004 | -0.013 |
| 417 | 0.032 | 0.023 | 0.027 | 0.019 | -0.009 | -0.005 | -0.014 |
| 418 | 0.033 | 0.022 | 0.028 | 0.018 | -0.011 | -0.005 | -0.015 |
| 419 | 0.027 | 0.018 | 0.020 | 0.015 | -0.009 | -0.007 | -0.012 |
| 420 | 0.025 | 0.017 | 0.019 | 0.013 | -0.008 | -0.006 | -0.011 |
| 421 | 0.025 | 0.016 | 0.019 | 0.012 | -0.009 | -0.006 | -0.013 |
| 422 | 0.023 | 0.014 | 0.017 | 0.010 | -0.009 | -0.006 | -0.013 |
| 423 | 0.018 | 0.012 | 0.015 | 0.009 | -0.007 | -0.004 | -0.010 |
| 424 | 0.017 | 0.011 | 0.013 | 0.009 | -0.005 | -0.003 | -0.008 |
| 425 | 0.018 | 0.013 | 0.014 | 0.010 | -0.005 | -0.004 | -0.008 |
| 426 | 0.018 | 0.013 | 0.014 | 0.010 | -0.005 | -0.003 | -0.008 |
| 427 | 0.022 | 0.016 | 0.018 | 0.012 | -0.006 | -0.004 | -0.010 |
| 428 | 0.021 | 0.015 | 0.017 | 0.012 | -0.006 | -0.005 | -0.010 |
| 429 | 0.019 | 0.013 | 0.015 | 0.011 | -0.006 | -0.004 | -0.008 |
| 430 | 0.023 | 0.016 | 0.020 | 0.014 | -0.007 | -0.003 | -0.009 |
| 431 | 0.027 | 0.020 | 0.024 | 0.015 | -0.007 | -0.004 | -0.012 |
| 432 | 0.023 | 0.016 | 0.020 | 0.013 | -0.007 | -0.003 | -0.010 |
| 433 | 0.024 | 0.017 | 0.022 | 0.015 | -0.007 | -0.002 | -0.009 |
| 434 | 0.032 | 0.024 | 0.030 | 0.020 | -0.008 | -0.001 | -0.011 |
| 435 | 0.032 | 0.018 | 0.030 | 0.020 | -0.014 | -0.003 | -0.012 |
| 436 | 0.030 | 0.011 | 0.024 | 0.019 | -0.019 | -0.006 | -0.011 |
| 437 | 0.037 | 0.022 | 0.023 | 0.007 | -0.015 | -0.014 | -0.029 |
| 438 | 0.042 | 0.030 | 0.029 | 0.028 | -0.012 | -0.013 | -0.014 |

|     |       |       |       |       |        |        |        |
|-----|-------|-------|-------|-------|--------|--------|--------|
| 439 | 0.043 | 0.029 | 0.033 | 0.022 | -0.014 | -0.010 | -0.021 |
| 440 | 0.042 | 0.032 | 0.028 | 0.022 | -0.010 | -0.013 | -0.020 |
| 441 | 0.048 | 0.034 | 0.014 | 0.025 | -0.014 | -0.034 | -0.023 |
| 442 | 0.052 | 0.026 | 0.019 | 0.032 | -0.027 | -0.033 | -0.020 |
| 443 | 0.051 | 0.041 | 0.032 | 0.029 | -0.010 | -0.019 | -0.022 |
| 444 | 0.051 | 0.040 | 0.029 | 0.030 | -0.012 | -0.023 | -0.022 |
| 445 | 0.055 | 0.044 | 0.020 | 0.033 | -0.011 | -0.035 | -0.022 |
| 446 | 0.056 | 0.038 | 0.029 | 0.032 | -0.018 | -0.027 | -0.024 |
| 447 | 0.055 | 0.045 | 0.048 | 0.030 | -0.011 | -0.007 | -0.025 |
| 448 | 0.054 | 0.046 | 0.041 | 0.031 | -0.008 | -0.013 | -0.023 |
| 449 | 0.061 | 0.038 | 0.033 | 0.036 | -0.023 | -0.028 | -0.025 |
| 450 | 0.059 | 0.037 | 0.048 | 0.034 | -0.023 | -0.011 | -0.025 |
| 451 | 0.053 | 0.046 | 0.050 | 0.032 | -0.007 | -0.003 | -0.021 |
| 452 | 0.056 | 0.046 | 0.050 | 0.034 | -0.010 | -0.007 | -0.022 |
| 453 | 0.060 | 0.044 | 0.046 | 0.038 | -0.016 | -0.014 | -0.023 |
| 454 | 0.055 | 0.043 | 0.046 | 0.035 | -0.012 | -0.010 | -0.021 |
| 455 | 0.051 | 0.045 | 0.046 | 0.032 | -0.006 | -0.005 | -0.019 |
| 456 | 0.058 | 0.045 | 0.045 | 0.040 | -0.013 | -0.013 | -0.018 |
| 457 | 0.054 | 0.050 | 0.044 | 0.041 | -0.003 | -0.009 | -0.012 |
| 458 | 0.047 | 0.048 | 0.043 | 0.038 | 0.001  | -0.003 | -0.009 |
| 459 | 0.047 | 0.049 | 0.042 | 0.041 | 0.002  | -0.005 | -0.006 |
| 460 | 0.042 | 0.037 | 0.036 | 0.042 | -0.005 | -0.006 | 0.001  |
| 461 | 0.043 | 0.047 | 0.048 | 0.046 | 0.004  | 0.005  | 0.003  |
| 462 | 0.048 | 0.056 | 0.053 | 0.049 | 0.008  | 0.005  | 0.001  |
| 463 | 0.054 | 0.058 | 0.055 | 0.046 | 0.004  | 0.001  | -0.008 |
| 464 | 0.051 | 0.050 | 0.054 | 0.045 | 0.000  | 0.004  | -0.006 |
| 465 | 0.051 | 0.056 | 0.056 | 0.047 | 0.005  | 0.005  | -0.004 |
| 466 | 0.060 | 0.060 | 0.061 | 0.049 | 0.000  | 0.001  | -0.010 |
| 467 | 0.060 | 0.056 | 0.056 | 0.047 | -0.004 | -0.004 | -0.013 |
| 468 | 0.054 | 0.051 | 0.053 | 0.045 | -0.003 | 0.000  | -0.009 |
| 469 | 0.060 | 0.058 | 0.048 | 0.046 | -0.002 | -0.011 | -0.014 |
| 470 | 0.068 | 0.060 | 0.040 | 0.045 | -0.008 | -0.028 | -0.023 |
| 471 | 0.062 | 0.048 | 0.053 | 0.041 | -0.014 | -0.009 | -0.021 |



|     |       |       |       |       |        |        |        |
|-----|-------|-------|-------|-------|--------|--------|--------|
| 472 | 0.060 | 0.053 | 0.058 | 0.041 | -0.006 | -0.001 | -0.019 |
| 473 | 0.066 | 0.053 | 0.056 | 0.043 | -0.012 | -0.009 | -0.023 |
| 474 | 0.065 | 0.038 | 0.039 | 0.044 | -0.027 | -0.026 | -0.021 |
| 475 | 0.061 | 0.041 | 0.057 | 0.037 | -0.020 | -0.004 | -0.024 |
| 476 | 0.058 | 0.049 | 0.054 | 0.034 | -0.009 | -0.005 | -0.024 |
| 477 | 0.058 | 0.045 | 0.056 | 0.040 | -0.013 | -0.002 | -0.018 |
| 478 | 0.057 | 0.021 | 0.051 | 0.039 | -0.036 | -0.007 | -0.019 |
| 479 | 0.055 | 0.044 | 0.051 | 0.032 | -0.011 | -0.004 | -0.023 |
| 480 | 0.050 | 0.041 | 0.049 | 0.030 | -0.008 | -0.001 | -0.019 |
| 481 | 0.055 | 0.029 | 0.050 | 0.036 | -0.026 | -0.005 | -0.018 |
| 482 | 0.050 | 0.034 | 0.048 | 0.031 | -0.016 | -0.003 | -0.019 |
| 483 | 0.048 | 0.032 | 0.042 | 0.025 | -0.016 | -0.006 | -0.023 |
| 484 | 0.049 | 0.033 | 0.043 | 0.026 | -0.016 | -0.006 | -0.024 |
| 485 | 0.045 | 0.025 | 0.040 | 0.030 | -0.021 | -0.006 | -0.015 |
| 486 | 0.040 | 0.025 | 0.038 | 0.025 | -0.015 | -0.002 | -0.015 |
| 487 | 0.039 | 0.023 | 0.030 | 0.021 | -0.015 | -0.008 | -0.018 |
| 488 | 0.038 | 0.028 | 0.030 | 0.020 | -0.009 | -0.007 | -0.017 |
| 489 | 0.039 | 0.034 | 0.035 | 0.023 | -0.006 | -0.005 | -0.017 |
| 490 | 0.033 | 0.026 | 0.029 | 0.019 | -0.007 | -0.004 | -0.014 |
| 491 | 0.029 | 0.022 | 0.023 | 0.015 | -0.006 | -0.006 | -0.014 |
| 492 | 0.030 | 0.023 | 0.024 | 0.016 | -0.007 | -0.006 | -0.014 |
| 493 | 0.030 | 0.023 | 0.025 | 0.017 | -0.007 | -0.006 | -0.013 |
| 494 | 0.025 | 0.019 | 0.019 | 0.013 | -0.006 | -0.006 | -0.012 |
| 495 | 0.023 | 0.017 | 0.017 | 0.012 | -0.006 | -0.006 | -0.011 |
| 496 | 0.026 | 0.019 | 0.019 | 0.013 | -0.007 | -0.007 | -0.012 |
| 497 | 0.025 | 0.019 | 0.019 | 0.014 | -0.006 | -0.006 | -0.011 |
| 498 | 0.020 | 0.016 | 0.016 | 0.012 | -0.004 | -0.004 | -0.008 |
| 499 | 0.021 | 0.016 | 0.017 | 0.013 | -0.005 | -0.004 | -0.008 |
| 500 | 0.022 | 0.013 | 0.015 | 0.012 | -0.009 | -0.007 | -0.010 |
| 501 | 0.017 | 0.010 | 0.013 | 0.009 | -0.006 | -0.004 | -0.008 |
| 502 | 0.015 | 0.009 | 0.013 | 0.009 | -0.006 | -0.002 | -0.006 |
| 503 | 0.018 | 0.011 | 0.016 | 0.011 | -0.007 | -0.002 | -0.007 |
| 504 | 0.025 | 0.012 | 0.020 | 0.014 | -0.012 | -0.005 | -0.011 |

|     |       |       |       |       |        |        |        |
|-----|-------|-------|-------|-------|--------|--------|--------|
| 505 | 0.024 | 0.013 | 0.019 | 0.012 | -0.011 | -0.004 | -0.012 |
| 506 | 0.030 | 0.012 | 0.026 | 0.000 | -0.018 | -0.004 | -0.030 |
| 507 | 0.027 | 0.011 | 0.021 | 0.001 | -0.016 | -0.006 | -0.027 |
| 508 | 0.015 | 0.011 | 0.018 | 0.013 | -0.004 | 0.003  | -0.002 |
| 509 | 0.015 | 0.010 | 0.017 | 0.012 | -0.005 | 0.003  | -0.003 |
| 510 | 0.024 | 0.014 | 0.020 | 0.012 | -0.011 | -0.004 | -0.012 |
| 511 | 0.025 | 0.016 | 0.020 | 0.013 | -0.009 | -0.005 | -0.012 |
| 512 | 0.024 | 0.014 | 0.020 | 0.013 | -0.010 | -0.004 | -0.011 |
| 513 | 0.026 | 0.016 | 0.024 | 0.013 | -0.011 | -0.003 | -0.013 |
| 514 | 0.021 | 0.012 | 0.018 | 0.009 | -0.009 | -0.003 | -0.012 |
| 515 | 0.021 | 0.011 | 0.017 | 0.009 | -0.010 | -0.005 | -0.012 |
| 516 | 0.028 | 0.018 | 0.024 | 0.014 | -0.010 | -0.004 | -0.015 |
| 517 | 0.030 | 0.019 | 0.025 | 0.014 | -0.011 | -0.006 | -0.016 |
| 518 | 0.022 | 0.014 | 0.020 | 0.011 | -0.008 | -0.002 | -0.011 |
| 519 | 0.023 | 0.017 | 0.024 | 0.012 | -0.007 | 0.000  | -0.012 |
| 520 | 0.031 | 0.022 | 0.029 | 0.016 | -0.009 | -0.002 | -0.016 |
| 521 | 0.028 | 0.019 | 0.025 | 0.013 | -0.009 | -0.003 | -0.015 |
| 522 | 0.021 | 0.014 | 0.020 | 0.010 | -0.006 | -0.001 | -0.010 |
| 523 | 0.025 | 0.019 | 0.026 | 0.012 | -0.006 | 0.001  | -0.013 |
| 524 | 0.030 | 0.021 | 0.030 | 0.015 | -0.010 | 0.000  | -0.016 |
| 525 | 0.022 | 0.015 | 0.021 | 0.010 | -0.008 | -0.001 | -0.012 |
| 526 | 0.021 | 0.015 | 0.020 | 0.010 | -0.006 | 0.000  | -0.011 |
| 527 | 0.028 | 0.019 | 0.027 | 0.013 | -0.009 | -0.001 | -0.015 |
| 528 | 0.024 | 0.016 | 0.026 | 0.012 | -0.009 | 0.001  | -0.012 |
| 529 | 0.019 | 0.012 | 0.018 | 0.008 | -0.007 | -0.001 | -0.010 |
| 530 | 0.022 | 0.014 | 0.021 | 0.010 | -0.007 | -0.001 | -0.012 |
| 531 | 0.026 | 0.017 | 0.026 | 0.012 | -0.009 | 0.000  | -0.014 |
| 532 | 0.019 | 0.012 | 0.019 | 0.009 | -0.008 | 0.000  | -0.011 |
| 533 | 0.015 | 0.010 | 0.015 | 0.007 | -0.005 | 0.001  | -0.008 |
| 534 | 0.019 | 0.014 | 0.019 | 0.009 | -0.005 | 0.000  | -0.010 |
| 535 | 0.017 | 0.011 | 0.018 | 0.008 | -0.005 | 0.001  | -0.009 |
| 536 | 0.011 | 0.007 | 0.013 | 0.005 | -0.004 | 0.002  | -0.006 |
| 537 | 0.011 | 0.008 | 0.013 | 0.005 | -0.004 | 0.001  | -0.006 |

|     |       |       |       |       |        |        |        |
|-----|-------|-------|-------|-------|--------|--------|--------|
| 538 | 0.015 | 0.011 | 0.015 | 0.007 | -0.004 | 0.001  | -0.008 |
| 539 | 0.014 | 0.009 | 0.015 | 0.006 | -0.005 | 0.001  | -0.007 |
| 540 | 0.014 | 0.009 | 0.016 | 0.007 | -0.005 | 0.002  | -0.007 |
| 541 | 0.020 | 0.013 | 0.019 | 0.009 | -0.008 | -0.001 | -0.011 |
| 542 | 0.021 | 0.014 | 0.020 | 0.009 | -0.007 | -0.001 | -0.011 |
| 543 | 0.020 | 0.013 | 0.020 | 0.010 | -0.007 | 0.000  | -0.011 |
| 544 | 0.023 | 0.014 | 0.022 | 0.011 | -0.009 | -0.002 | -0.012 |
| 545 | 0.027 | 0.017 | 0.024 | 0.012 | -0.009 | -0.003 | -0.014 |
| 546 | 0.024 | 0.017 | 0.023 | 0.012 | -0.007 | -0.001 | -0.012 |
| 547 | 0.026 | 0.017 | 0.024 | 0.012 | -0.009 | -0.002 | -0.013 |
| 548 | 0.033 | 0.022 | 0.030 | 0.016 | -0.010 | -0.003 | -0.016 |
| 549 | 0.031 | 0.025 | 0.032 | 0.017 | -0.007 | 0.001  | -0.014 |
| 550 | 0.029 | 0.022 | 0.029 | 0.016 | -0.007 | 0.001  | -0.013 |
| 551 | 0.033 | 0.024 | 0.032 | 0.018 | -0.009 | -0.001 | -0.015 |
| 552 | 0.038 | 0.030 | 0.038 | 0.024 | -0.009 | 0.000  | -0.014 |
| 553 | 0.035 | 0.027 | 0.037 | 0.023 | -0.008 | 0.001  | -0.013 |
| 554 | 0.033 | 0.025 | 0.033 | 0.021 | -0.007 | 0.001  | -0.012 |
| 555 | 0.038 | 0.033 | 0.039 | 0.027 | -0.004 | 0.001  | -0.011 |
| 556 | 0.043 | 0.034 | 0.043 | 0.032 | -0.009 | 0.001  | -0.011 |
| 557 | 0.038 | 0.030 | 0.037 | 0.029 | -0.008 | 0.000  | -0.008 |
| 558 | 0.039 | 0.035 | 0.040 | 0.031 | -0.004 | 0.001  | -0.008 |
| 559 | 0.041 | 0.041 | 0.047 | 0.035 | 0.000  | 0.006  | -0.006 |
| 560 | 0.049 | 0.044 | 0.025 | 0.041 | -0.005 | -0.024 | -0.008 |
| 561 | 0.051 | 0.047 | 0.055 | 0.043 | -0.004 | 0.004  | -0.008 |
| 562 | 0.053 | 0.054 | 0.041 | 0.053 | 0.001  | -0.011 | 0.000  |
| 563 | 0.050 | 0.057 | 0.027 | 0.054 | 0.007  | -0.023 | 0.004  |
| 564 | 0.055 | 0.061 | 0.017 | 0.060 | 0.006  | -0.038 | 0.005  |
| 565 | 0.053 | 0.061 | 0.021 | 0.062 | 0.009  | -0.032 | 0.009  |
| 566 | 0.049 | 0.061 | 0.054 | 0.062 | 0.011  | 0.005  | 0.013  |
| 567 | 0.048 | 0.061 | 0.055 | 0.063 | 0.013  | 0.007  | 0.015  |
| 568 | 0.040 | 0.055 | 0.049 | 0.053 | 0.015  | 0.009  | 0.013  |
| 569 | 0.039 | 0.053 | 0.051 | 0.056 | 0.014  | 0.012  | 0.018  |
| 570 | 0.033 | 0.046 | 0.029 | 0.047 | 0.013  | -0.004 | 0.015  |

|     |       |       |       |       |       |       |       |
|-----|-------|-------|-------|-------|-------|-------|-------|
| 571 | 0.029 | 0.043 | 0.044 | 0.049 | 0.014 | 0.015 | 0.020 |
| 572 | 0.028 | 0.041 | 0.048 | 0.047 | 0.013 | 0.020 | 0.019 |
| 573 | 0.025 | 0.040 | 0.047 | 0.045 | 0.015 | 0.022 | 0.020 |
| 574 | 0.021 | 0.035 | 0.039 | 0.041 | 0.014 | 0.018 | 0.020 |
| 575 | 0.020 | 0.036 | 0.040 | 0.042 | 0.016 | 0.020 | 0.022 |
| 576 | 0.017 | 0.032 | 0.035 | 0.039 | 0.015 | 0.019 | 0.022 |
| 577 | 0.015 | 0.031 | 0.035 | 0.040 | 0.016 | 0.020 | 0.025 |
| 578 | 0.014 | 0.026 | 0.030 | 0.034 | 0.012 | 0.017 | 0.020 |
| 579 | 0.013 | 0.024 | 0.027 | 0.029 | 0.011 | 0.014 | 0.016 |
| 580 | 0.013 | 0.026 | 0.030 | 0.034 | 0.014 | 0.017 | 0.021 |
| 581 | 0.013 | 0.021 | 0.015 | 0.035 | 0.008 | 0.002 | 0.022 |
| 582 | 0.016 | 0.024 | 0.020 | 0.036 | 0.008 | 0.003 | 0.020 |
| 583 | 0.015 | 0.018 | 0.022 | 0.037 | 0.002 | 0.007 | 0.022 |
| 584 | 0.015 | 0.023 | 0.032 | 0.032 | 0.007 | 0.016 | 0.017 |
| 585 | 0.013 | 0.022 | 0.025 | 0.032 | 0.009 | 0.013 | 0.019 |
| 586 | 0.011 | 0.021 | 0.024 | 0.027 | 0.010 | 0.013 | 0.017 |
| 587 | 0.013 | 0.026 | 0.030 | 0.036 | 0.013 | 0.017 | 0.024 |
| 588 | 0.013 | 0.024 | 0.025 | 0.031 | 0.011 | 0.013 | 0.018 |
| 589 | 0.010 | 0.018 | 0.021 | 0.025 | 0.009 | 0.011 | 0.015 |
| 590 | 0.011 | 0.021 | 0.024 | 0.028 | 0.011 | 0.013 | 0.017 |
| 591 | 0.013 | 0.025 | 0.027 | 0.031 | 0.012 | 0.014 | 0.018 |
| 592 | 0.011 | 0.021 | 0.022 | 0.027 | 0.010 | 0.011 | 0.017 |
| 593 | 0.008 | 0.017 | 0.018 | 0.023 | 0.008 | 0.009 | 0.015 |
| 594 | 0.012 | 0.023 | 0.022 | 0.028 | 0.011 | 0.011 | 0.017 |
| 595 | 0.012 | 0.023 | 0.022 | 0.028 | 0.010 | 0.009 | 0.016 |
| 596 | 0.009 | 0.017 | 0.017 | 0.023 | 0.009 | 0.008 | 0.014 |
| 597 | 0.009 | 0.017 | 0.017 | 0.023 | 0.008 | 0.007 | 0.014 |
| 598 | 0.013 | 0.023 | 0.022 | 0.028 | 0.010 | 0.009 | 0.015 |
| 599 | 0.012 | 0.022 | 0.020 | 0.027 | 0.011 | 0.009 | 0.016 |
| 600 | 0.008 | 0.018 | 0.015 | 0.022 | 0.009 | 0.007 | 0.013 |
| 601 | 0.009 | 0.017 | 0.017 | 0.021 | 0.008 | 0.008 | 0.012 |
| 602 | 0.016 | 0.023 | 0.021 | 0.028 | 0.007 | 0.005 | 0.012 |
| 603 | 0.014 | 0.026 | 0.022 | 0.026 | 0.012 | 0.008 | 0.013 |

|     |       |       |       |       |       |        |       |
|-----|-------|-------|-------|-------|-------|--------|-------|
| 604 | 0.016 | 0.024 | 0.021 | 0.024 | 0.008 | 0.005  | 0.008 |
| 605 | 0.021 | 0.031 | 0.028 | 0.032 | 0.010 | 0.007  | 0.012 |
| 606 | 0.018 | 0.028 | 0.027 | 0.031 | 0.010 | 0.009  | 0.013 |
| 607 | 0.016 | 0.027 | 0.026 | 0.030 | 0.011 | 0.010  | 0.015 |
| 608 | 0.015 | 0.025 | 0.024 | 0.028 | 0.010 | 0.010  | 0.013 |
| 609 | 0.014 | 0.026 | 0.026 | 0.031 | 0.012 | 0.012  | 0.016 |
| 610 | 0.015 | 0.029 | 0.028 | 0.034 | 0.014 | 0.013  | 0.019 |
| 611 | 0.015 | 0.030 | 0.030 | 0.037 | 0.015 | 0.015  | 0.022 |
| 612 | 0.015 | 0.033 | 0.034 | 0.040 | 0.018 | 0.018  | 0.025 |
| 613 | 0.014 | 0.033 | 0.035 | 0.040 | 0.018 | 0.021  | 0.026 |
| 614 | 0.015 | 0.035 | 0.038 | 0.045 | 0.020 | 0.023  | 0.029 |
| 615 | 0.018 | 0.041 | 0.040 | 0.048 | 0.023 | 0.022  | 0.030 |
| 616 | 0.024 | 0.046 | 0.043 | 0.051 | 0.022 | 0.018  | 0.027 |
| 617 | 0.031 | 0.049 | 0.034 | 0.050 | 0.017 | 0.003  | 0.019 |
| 618 | 0.025 | 0.045 | 0.025 | 0.054 | 0.021 | 0.000  | 0.029 |
| 619 | 0.023 | 0.044 | 0.026 | 0.057 | 0.021 | 0.003  | 0.034 |
| 620 | 0.023 | 0.040 | 0.034 | 0.055 | 0.017 | 0.011  | 0.032 |
| 621 | 0.015 | 0.036 | 0.034 | 0.047 | 0.021 | 0.019  | 0.032 |
| 622 | 0.014 | 0.028 | 0.035 | 0.039 | 0.014 | 0.021  | 0.025 |
| 623 | 0.017 | 0.033 | 0.035 | 0.040 | 0.016 | 0.017  | 0.023 |
| 624 | 0.016 | 0.033 | 0.040 | 0.042 | 0.017 | 0.024  | 0.026 |
| 625 | 0.017 | 0.036 | 0.038 | 0.044 | 0.018 | 0.021  | 0.027 |
| 626 | 0.019 | 0.037 | 0.038 | 0.043 | 0.019 | 0.019  | 0.024 |
| 627 | 0.018 | 0.035 | 0.035 | 0.040 | 0.017 | 0.017  | 0.022 |
| 628 | 0.020 | 0.035 | 0.037 | 0.041 | 0.015 | 0.017  | 0.021 |
| 629 | 0.022 | 0.035 | 0.037 | 0.042 | 0.013 | 0.015  | 0.020 |
| 630 | 0.023 | 0.035 | 0.037 | 0.040 | 0.012 | 0.014  | 0.017 |
| 631 | 0.024 | 0.035 | 0.035 | 0.039 | 0.011 | 0.011  | 0.016 |
| 632 | 0.022 | 0.033 | 0.029 | 0.034 | 0.011 | 0.007  | 0.012 |
| 633 | 0.027 | 0.038 | 0.025 | 0.037 | 0.011 | -0.002 | 0.010 |
| 634 | 0.033 | 0.043 | 0.020 | 0.039 | 0.010 | -0.013 | 0.006 |
| 635 | 0.028 | 0.031 | 0.020 | 0.033 | 0.004 | -0.008 | 0.005 |
| 636 | 0.020 | 0.028 | 0.022 | 0.029 | 0.008 | 0.001  | 0.009 |

|     |       |       |       |       |       |        |       |
|-----|-------|-------|-------|-------|-------|--------|-------|
| 637 | 0.023 | 0.033 | 0.028 | 0.032 | 0.009 | 0.005  | 0.008 |
| 638 | 0.025 | 0.032 | 0.030 | 0.030 | 0.007 | 0.005  | 0.005 |
| 639 | 0.028 | 0.031 | 0.031 | 0.029 | 0.003 | 0.003  | 0.001 |
| 640 | 0.034 | 0.041 | 0.036 | 0.037 | 0.007 | 0.002  | 0.004 |
| 641 | 0.026 | 0.028 | 0.029 | 0.035 | 0.002 | 0.003  | 0.009 |
| 642 | 0.025 | 0.037 | 0.030 | 0.039 | 0.012 | 0.004  | 0.014 |
| 643 | 0.030 | 0.040 | 0.041 | 0.043 | 0.010 | 0.010  | 0.013 |
| 644 | 0.031 | 0.041 | 0.044 | 0.046 | 0.010 | 0.013  | 0.015 |
| 645 | 0.032 | 0.045 | 0.045 | 0.049 | 0.012 | 0.013  | 0.016 |
| 646 | 0.026 | 0.034 | 0.035 | 0.037 | 0.009 | 0.010  | 0.011 |
| 647 | 0.022 | 0.032 | 0.032 | 0.035 | 0.009 | 0.010  | 0.013 |
| 648 | 0.025 | 0.036 | 0.039 | 0.040 | 0.011 | 0.014  | 0.016 |
| 649 | 0.022 | 0.031 | 0.032 | 0.033 | 0.010 | 0.011  | 0.012 |
| 650 | 0.019 | 0.027 | 0.027 | 0.032 | 0.008 | 0.008  | 0.013 |
| 651 | 0.017 | 0.027 | 0.028 | 0.032 | 0.010 | 0.011  | 0.015 |
| 652 | 0.018 | 0.029 | 0.033 | 0.034 | 0.011 | 0.015  | 0.016 |
| 653 | 0.015 | 0.023 | 0.026 | 0.031 | 0.008 | 0.011  | 0.016 |
| 654 | 0.012 | 0.021 | 0.023 | 0.031 | 0.009 | 0.011  | 0.018 |
| 655 | 0.013 | 0.022 | 0.025 | 0.031 | 0.009 | 0.012  | 0.018 |
| 656 | 0.018 | 0.027 | 0.030 | 0.036 | 0.009 | 0.012  | 0.017 |
| 657 | 0.014 | 0.019 | 0.022 | 0.029 | 0.005 | 0.008  | 0.014 |
| 658 | 0.013 | 0.018 | 0.022 | 0.028 | 0.005 | 0.009  | 0.015 |
| 659 | 0.012 | 0.018 | 0.020 | 0.024 | 0.005 | 0.008  | 0.012 |
| 660 | 0.012 | 0.018 | 0.023 | 0.027 | 0.006 | 0.011  | 0.015 |
| 661 | 0.013 | 0.024 | 0.027 | 0.032 | 0.010 | 0.014  | 0.019 |
| 662 | 0.015 | 0.027 | 0.030 | 0.033 | 0.011 | 0.015  | 0.018 |
| 663 | 0.016 | 0.030 | 0.031 | 0.034 | 0.014 | 0.015  | 0.018 |
| 664 | 0.019 | 0.034 | 0.037 | 0.036 | 0.014 | 0.017  | 0.017 |
| 665 | 0.024 | 0.037 | 0.043 | 0.041 | 0.013 | 0.018  | 0.017 |
| 666 | 0.029 | 0.043 | 0.047 | 0.043 | 0.014 | 0.019  | 0.014 |
| 667 | 0.033 | 0.048 | 0.052 | 0.048 | 0.015 | 0.019  | 0.016 |
| 668 | 0.037 | 0.054 | 0.029 | 0.055 | 0.018 | -0.008 | 0.019 |
| 669 | 0.038 | 0.059 | 0.035 | 0.059 | 0.020 | -0.003 | 0.021 |

|     |       |       |       |       |       |        |       |
|-----|-------|-------|-------|-------|-------|--------|-------|
| 670 | 0.055 | 0.063 | 0.046 | 0.069 | 0.008 | -0.008 | 0.015 |
| 671 | 0.053 | 0.061 | 0.034 | 0.066 | 0.008 | -0.018 | 0.013 |
| 672 | 0.045 | 0.057 | 0.030 | 0.068 | 0.011 | -0.015 | 0.023 |
| 673 | 0.042 | 0.054 | 0.035 | 0.063 | 0.012 | -0.008 | 0.021 |
| 674 | 0.047 | 0.051 | 0.017 | 0.065 | 0.004 | -0.031 | 0.018 |
| 675 | 0.046 | 0.048 | 0.001 | 0.065 | 0.002 | -0.045 | 0.019 |
| 676 | 0.039 | 0.062 | 0.023 | 0.070 | 0.023 | -0.016 | 0.031 |
| 677 | 0.040 | 0.061 | 0.023 | 0.062 | 0.021 | -0.017 | 0.022 |
| 678 | 0.038 | 0.062 | 0.041 | 0.051 | 0.024 | 0.003  | 0.013 |
| 679 | 0.035 | 0.057 | 0.044 | 0.050 | 0.022 | 0.009  | 0.015 |
| 680 | 0.032 | 0.050 | 0.042 | 0.050 | 0.018 | 0.010  | 0.018 |
| 681 | 0.026 | 0.044 | 0.032 | 0.048 | 0.018 | 0.006  | 0.022 |
| 682 | 0.022 | 0.039 | 0.032 | 0.041 | 0.017 | 0.010  | 0.019 |
| 683 | 0.016 | 0.031 | 0.029 | 0.043 | 0.015 | 0.013  | 0.027 |
| 684 | 0.012 | 0.025 | 0.024 | 0.033 | 0.013 | 0.011  | 0.021 |
| 685 | 0.010 | 0.022 | 0.019 | 0.029 | 0.012 | 0.008  | 0.019 |
| 686 | 0.007 | 0.016 | 0.016 | 0.022 | 0.009 | 0.009  | 0.015 |
| 687 | 0.006 | 0.016 | 0.015 | 0.021 | 0.009 | 0.009  | 0.014 |
| 688 | 0.004 | 0.011 | 0.013 | 0.015 | 0.007 | 0.009  | 0.011 |
| 689 | 0.005 | 0.012 | 0.014 | 0.017 | 0.008 | 0.009  | 0.012 |
| 690 | 0.005 | 0.012 | 0.014 | 0.016 | 0.007 | 0.009  | 0.011 |
| 691 | 0.006 | 0.014 | 0.017 | 0.020 | 0.008 | 0.011  | 0.015 |
| 692 | 0.007 | 0.016 | 0.021 | 0.025 | 0.009 | 0.014  | 0.018 |
| 693 | 0.007 | 0.015 | 0.018 | 0.022 | 0.008 | 0.011  | 0.015 |
| 694 | 0.006 | 0.014 | 0.016 | 0.020 | 0.007 | 0.009  | 0.013 |
| 695 | 0.008 | 0.018 | 0.020 | 0.025 | 0.009 | 0.011  | 0.017 |
| 696 | 0.009 | 0.019 | 0.021 | 0.026 | 0.009 | 0.011  | 0.017 |
| 697 | 0.008 | 0.015 | 0.017 | 0.021 | 0.007 | 0.009  | 0.013 |
| 698 | 0.009 | 0.016 | 0.018 | 0.023 | 0.007 | 0.009  | 0.014 |
| 699 | 0.012 | 0.020 | 0.022 | 0.028 | 0.009 | 0.010  | 0.016 |
| 700 | 0.011 | 0.018 | 0.020 | 0.025 | 0.008 | 0.010  | 0.015 |
| 701 | 0.009 | 0.015 | 0.016 | 0.020 | 0.006 | 0.008  | 0.011 |
| 702 | 0.011 | 0.018 | 0.020 | 0.025 | 0.007 | 0.008  | 0.014 |

|     |       |       |       |       |       |       |       |
|-----|-------|-------|-------|-------|-------|-------|-------|
| 703 | 0.014 | 0.024 | 0.025 | 0.030 | 0.009 | 0.010 | 0.016 |
| 704 | 0.011 | 0.017 | 0.019 | 0.023 | 0.006 | 0.008 | 0.012 |
| 705 | 0.010 | 0.014 | 0.016 | 0.020 | 0.005 | 0.006 | 0.010 |
| 706 | 0.015 | 0.021 | 0.022 | 0.028 | 0.006 | 0.008 | 0.014 |
| 707 | 0.014 | 0.021 | 0.022 | 0.027 | 0.007 | 0.007 | 0.013 |
| 708 | 0.012 | 0.016 | 0.017 | 0.023 | 0.004 | 0.005 | 0.011 |
| 709 | 0.016 | 0.019 | 0.020 | 0.025 | 0.003 | 0.004 | 0.009 |
| 710 | 0.018 | 0.023 | 0.023 | 0.027 | 0.005 | 0.005 | 0.009 |
| 711 | 0.024 | 0.029 | 0.026 | 0.029 | 0.004 | 0.002 | 0.005 |
| 712 | 0.026 | 0.032 | 0.031 | 0.034 | 0.006 | 0.004 | 0.007 |
| 713 | 0.026 | 0.034 | 0.034 | 0.038 | 0.008 | 0.008 | 0.013 |
| 714 | 0.024 | 0.034 | 0.035 | 0.042 | 0.010 | 0.011 | 0.018 |
| 715 | 0.021 | 0.032 | 0.035 | 0.041 | 0.011 | 0.014 | 0.019 |
| 716 | 0.019 | 0.033 | 0.035 | 0.041 | 0.014 | 0.016 | 0.022 |
| 717 | 0.018 | 0.033 | 0.036 | 0.044 | 0.016 | 0.018 | 0.026 |
| 718 | 0.021 | 0.042 | 0.039 | 0.051 | 0.020 | 0.018 | 0.029 |
| 719 | 0.021 | 0.037 | 0.034 | 0.046 | 0.016 | 0.013 | 0.025 |
| 720 | 0.019 | 0.032 | 0.037 | 0.048 | 0.013 | 0.018 | 0.029 |
| 721 | 0.017 | 0.026 | 0.033 | 0.041 | 0.009 | 0.015 | 0.023 |
| 722 | 0.013 | 0.020 | 0.026 | 0.035 | 0.007 | 0.013 | 0.022 |
| 723 | 0.012 | 0.023 | 0.026 | 0.033 | 0.010 | 0.014 | 0.021 |
| 724 | 0.010 | 0.020 | 0.023 | 0.026 | 0.010 | 0.013 | 0.016 |
| 725 | 0.010 | 0.021 | 0.020 | 0.027 | 0.011 | 0.010 | 0.017 |
| 726 | 0.007 | 0.015 | 0.014 | 0.023 | 0.008 | 0.007 | 0.016 |
| 727 | 0.007 | 0.016 | 0.019 | 0.021 | 0.009 | 0.012 | 0.014 |
| 728 | 0.004 | 0.014 | 0.016 | 0.017 | 0.009 | 0.011 | 0.013 |
| 729 | 0.003 | 0.010 | 0.012 | 0.013 | 0.007 | 0.009 | 0.010 |
| 730 | 0.002 | 0.008 | 0.011 | 0.011 | 0.006 | 0.008 | 0.009 |
| 731 | 0.001 | 0.006 | 0.007 | 0.008 | 0.005 | 0.006 | 0.006 |
| 732 | 0.001 | 0.006 | 0.007 | 0.008 | 0.005 | 0.006 | 0.007 |
| 733 | 0.001 | 0.003 | 0.004 | 0.004 | 0.003 | 0.003 | 0.004 |
| 734 | 0.001 | 0.003 | 0.004 | 0.004 | 0.002 | 0.003 | 0.003 |
| 735 | 0.001 | 0.004 | 0.005 | 0.006 | 0.003 | 0.005 | 0.005 |



|     |       |       |       |       |       |       |       |
|-----|-------|-------|-------|-------|-------|-------|-------|
| 736 | 0.001 | 0.003 | 0.005 | 0.005 | 0.003 | 0.004 | 0.004 |
| 737 | 0.000 | 0.002 | 0.002 | 0.002 | 0.001 | 0.002 | 0.002 |
| 738 | 0.001 | 0.002 | 0.003 | 0.003 | 0.002 | 0.003 | 0.003 |
| 739 | 0.001 | 0.003 | 0.004 | 0.004 | 0.002 | 0.003 | 0.003 |
| 740 | 0.001 | 0.004 | 0.006 | 0.006 | 0.003 | 0.005 | 0.005 |
| 741 | 0.001 | 0.005 | 0.006 | 0.007 | 0.004 | 0.005 | 0.006 |
| 742 | 0.002 | 0.007 | 0.008 | 0.010 | 0.005 | 0.007 | 0.009 |
| 743 | 0.002 | 0.008 | 0.010 | 0.012 | 0.006 | 0.008 | 0.010 |
| 744 | 0.002 | 0.007 | 0.010 | 0.011 | 0.005 | 0.008 | 0.009 |
| 745 | 0.002 | 0.008 | 0.011 | 0.012 | 0.006 | 0.009 | 0.010 |
| 746 | 0.003 | 0.011 | 0.014 | 0.016 | 0.008 | 0.011 | 0.013 |
| 747 | 0.003 | 0.010 | 0.013 | 0.014 | 0.007 | 0.011 | 0.011 |
| 748 | 0.003 | 0.009 | 0.013 | 0.014 | 0.006 | 0.010 | 0.011 |
| 749 | 0.004 | 0.012 | 0.017 | 0.018 | 0.009 | 0.013 | 0.014 |
| 750 | 0.005 | 0.015 | 0.020 | 0.020 | 0.010 | 0.015 | 0.015 |
| 751 | 0.004 | 0.014 | 0.019 | 0.018 | 0.010 | 0.014 | 0.014 |
| 752 | 0.004 | 0.014 | 0.017 | 0.018 | 0.009 | 0.013 | 0.014 |
| 753 | 0.007 | 0.016 | 0.019 | 0.021 | 0.009 | 0.012 | 0.015 |
| 754 | 0.012 | 0.020 | 0.023 | 0.024 | 0.007 | 0.011 | 0.012 |
| 755 | 0.008 | 0.021 | 0.021 | 0.021 | 0.012 | 0.012 | 0.013 |
| 756 | 0.006 | 0.017 | 0.024 | 0.020 | 0.011 | 0.018 | 0.014 |
| 757 | 0.006 | 0.017 | 0.024 | 0.021 | 0.011 | 0.018 | 0.015 |
| 758 | 0.005 | 0.013 | 0.019 | 0.017 | 0.008 | 0.014 | 0.013 |
| 759 | 0.005 | 0.013 | 0.018 | 0.017 | 0.008 | 0.013 | 0.012 |
| 760 | 0.006 | 0.014 | 0.019 | 0.018 | 0.008 | 0.013 | 0.012 |
| 761 | 0.006 | 0.014 | 0.017 | 0.016 | 0.008 | 0.012 | 0.010 |
| 762 | 0.005 | 0.014 | 0.016 | 0.015 | 0.009 | 0.012 | 0.010 |
| 763 | 0.005 | 0.010 | 0.014 | 0.016 | 0.004 | 0.008 | 0.011 |
| 764 | 0.006 | 0.011 | 0.012 | 0.015 | 0.005 | 0.006 | 0.008 |
| 765 | 0.008 | 0.013 | 0.014 | 0.014 | 0.005 | 0.006 | 0.006 |
| 766 | 0.008 | 0.017 | 0.018 | 0.018 | 0.009 | 0.010 | 0.010 |
| 767 | 0.009 | 0.019 | 0.021 | 0.020 | 0.010 | 0.012 | 0.011 |
| 768 | 0.008 | 0.021 | 0.023 | 0.023 | 0.013 | 0.015 | 0.014 |

|     |       |       |       |       |       |       |       |
|-----|-------|-------|-------|-------|-------|-------|-------|
| 769 | 0.008 | 0.019 | 0.025 | 0.022 | 0.011 | 0.018 | 0.015 |
| 770 | 0.006 | 0.017 | 0.021 | 0.018 | 0.011 | 0.015 | 0.012 |
| 771 | 0.007 | 0.019 | 0.021 | 0.020 | 0.012 | 0.014 | 0.012 |
| 772 | 0.005 | 0.015 | 0.022 | 0.016 | 0.010 | 0.018 | 0.012 |
| 773 | 0.005 | 0.015 | 0.021 | 0.017 | 0.010 | 0.016 | 0.012 |
| 774 | 0.004 | 0.012 | 0.018 | 0.016 | 0.008 | 0.013 | 0.012 |
| 775 | 0.005 | 0.013 | 0.018 | 0.017 | 0.008 | 0.013 | 0.012 |
| 776 | 0.007 | 0.015 | 0.020 | 0.021 | 0.008 | 0.014 | 0.014 |
| 777 | 0.005 | 0.013 | 0.017 | 0.018 | 0.007 | 0.011 | 0.012 |
| 778 | 0.005 | 0.012 | 0.017 | 0.017 | 0.007 | 0.012 | 0.012 |
| 779 | 0.006 | 0.014 | 0.017 | 0.020 | 0.008 | 0.011 | 0.014 |
| 780 | 0.007 | 0.015 | 0.019 | 0.021 | 0.008 | 0.012 | 0.015 |
| 781 | 0.005 | 0.012 | 0.015 | 0.017 | 0.007 | 0.010 | 0.012 |
| 782 | 0.004 | 0.011 | 0.014 | 0.014 | 0.007 | 0.009 | 0.010 |
| 783 | 0.003 | 0.008 | 0.011 | 0.011 | 0.005 | 0.008 | 0.008 |
| 784 | 0.004 | 0.010 | 0.013 | 0.013 | 0.006 | 0.010 | 0.009 |
| 785 | 0.003 | 0.010 | 0.013 | 0.014 | 0.007 | 0.010 | 0.010 |
| 786 | 0.002 | 0.007 | 0.010 | 0.009 | 0.005 | 0.007 | 0.007 |
| 787 | 0.002 | 0.007 | 0.010 | 0.009 | 0.005 | 0.007 | 0.006 |
| 788 | 0.002 | 0.007 | 0.011 | 0.010 | 0.005 | 0.008 | 0.008 |
| 789 | 0.002 | 0.006 | 0.009 | 0.009 | 0.004 | 0.007 | 0.007 |
| 790 | 0.001 | 0.006 | 0.008 | 0.009 | 0.004 | 0.007 | 0.007 |
| 791 | 0.001 | 0.004 | 0.006 | 0.007 | 0.003 | 0.005 | 0.005 |
| 792 | 0.001 | 0.003 | 0.004 | 0.004 | 0.002 | 0.004 | 0.004 |
| 793 | 0.001 | 0.002 | 0.004 | 0.004 | 0.002 | 0.003 | 0.003 |
| 794 | 0.000 | 0.002 | 0.003 | 0.003 | 0.001 | 0.002 | 0.003 |
| 795 | 0.001 | 0.002 | 0.004 | 0.004 | 0.001 | 0.003 | 0.003 |
| 796 | 0.001 | 0.002 | 0.003 | 0.003 | 0.001 | 0.003 | 0.003 |
| 797 | 0.001 | 0.002 | 0.005 | 0.004 | 0.002 | 0.004 | 0.003 |
| 798 | 0.001 | 0.003 | 0.005 | 0.005 | 0.002 | 0.004 | 0.004 |
| 799 | 0.001 | 0.005 | 0.007 | 0.007 | 0.003 | 0.006 | 0.005 |
| 800 | 0.002 | 0.006 | 0.009 | 0.009 | 0.005 | 0.007 | 0.007 |
| 801 | 0.002 | 0.006 | 0.008 | 0.008 | 0.004 | 0.006 | 0.006 |

|     |       |       |       |       |       |        |       |
|-----|-------|-------|-------|-------|-------|--------|-------|
| 802 | 0.001 | 0.003 | 0.005 | 0.005 | 0.002 | 0.004  | 0.004 |
| 803 | 0.001 | 0.004 | 0.006 | 0.006 | 0.003 | 0.005  | 0.005 |
| 804 | 0.002 | 0.007 | 0.009 | 0.010 | 0.005 | 0.007  | 0.008 |
| 805 | 0.002 | 0.007 | 0.009 | 0.010 | 0.005 | 0.007  | 0.008 |
| 806 | 0.004 | 0.011 | 0.012 | 0.014 | 0.008 | 0.008  | 0.010 |
| 807 | 0.004 | 0.011 | 0.011 | 0.017 | 0.007 | 0.007  | 0.012 |
| 808 | 0.006 | 0.014 | 0.012 | 0.012 | 0.008 | 0.006  | 0.006 |
| 809 | 0.008 | 0.015 | 0.019 | 0.012 | 0.007 | 0.011  | 0.004 |
| 810 | 0.010 | 0.016 | 0.021 | 0.017 | 0.007 | 0.011  | 0.007 |
| 811 | 0.011 | 0.021 | 0.025 | 0.025 | 0.010 | 0.014  | 0.014 |
| 812 | 0.015 | 0.025 | 0.029 | 0.040 | 0.010 | 0.014  | 0.025 |
| 813 | 0.013 | 0.034 | 0.033 | 0.043 | 0.021 | 0.020  | 0.030 |
| 814 | 0.014 | 0.034 | 0.035 | 0.046 | 0.020 | 0.021  | 0.032 |
| 815 | 0.012 | 0.028 | 0.031 | 0.042 | 0.016 | 0.020  | 0.030 |
| 816 | 0.013 | 0.027 | 0.031 | 0.041 | 0.015 | 0.019  | 0.028 |
| 817 | 0.011 | 0.024 | 0.024 | 0.035 | 0.013 | 0.013  | 0.025 |
| 818 | 0.013 | 0.026 | 0.025 | 0.037 | 0.013 | 0.012  | 0.024 |
| 819 | 0.011 | 0.025 | 0.023 | 0.033 | 0.014 | 0.012  | 0.021 |
| 820 | 0.009 | 0.022 | 0.022 | 0.032 | 0.013 | 0.013  | 0.023 |
| 821 | 0.008 | 0.020 | 0.019 | 0.030 | 0.011 | 0.010  | 0.022 |
| 822 | 0.009 | 0.021 | 0.022 | 0.034 | 0.012 | 0.012  | 0.025 |
| 823 | 0.011 | 0.024 | 0.026 | 0.036 | 0.013 | 0.015  | 0.025 |
| 824 | 0.014 | 0.029 | 0.031 | 0.041 | 0.015 | 0.017  | 0.027 |
| 825 | 0.019 | 0.034 | 0.034 | 0.044 | 0.015 | 0.016  | 0.025 |
| 826 | 0.020 | 0.035 | 0.036 | 0.043 | 0.014 | 0.016  | 0.022 |
| 827 | 0.026 | 0.042 | 0.042 | 0.051 | 0.016 | 0.016  | 0.026 |
| 828 | 0.028 | 0.041 | 0.042 | 0.048 | 0.014 | 0.014  | 0.020 |
| 829 | 0.035 | 0.045 | 0.042 | 0.046 | 0.010 | 0.007  | 0.011 |
| 830 | 0.036 | 0.042 | 0.038 | 0.041 | 0.006 | 0.002  | 0.006 |
| 831 | 0.030 | 0.035 | 0.033 | 0.036 | 0.006 | 0.003  | 0.007 |
| 832 | 0.036 | 0.042 | 0.034 | 0.040 | 0.006 | -0.003 | 0.004 |
| 833 | 0.033 | 0.041 | 0.032 | 0.039 | 0.008 | -0.002 | 0.006 |
| 834 | 0.015 | 0.036 | 0.032 | 0.038 | 0.021 | 0.017  | 0.023 |

|     |       |       |       |       |        |        |       |
|-----|-------|-------|-------|-------|--------|--------|-------|
| 835 | 0.009 | 0.042 | 0.036 | 0.047 | 0.033  | 0.026  | 0.038 |
| 836 | 0.013 | 0.046 | 0.038 | 0.052 | 0.033  | 0.026  | 0.039 |
| 837 | 0.012 | 0.038 | 0.034 | 0.047 | 0.026  | 0.022  | 0.035 |
| 838 | 0.013 | 0.031 | 0.031 | 0.041 | 0.018  | 0.018  | 0.027 |
| 839 | 0.021 | 0.037 | 0.033 | 0.038 | 0.015  | 0.012  | 0.017 |
| 840 | 0.025 | 0.035 | 0.032 | 0.042 | 0.010  | 0.007  | 0.017 |
| 841 | 0.021 | 0.028 | 0.025 | 0.033 | 0.007  | 0.004  | 0.012 |
| 842 | 0.020 | 0.026 | 0.024 | 0.029 | 0.006  | 0.004  | 0.009 |
| 843 | 0.020 | 0.027 | 0.026 | 0.031 | 0.007  | 0.006  | 0.011 |
| 844 | 0.017 | 0.025 | 0.021 | 0.029 | 0.008  | 0.003  | 0.011 |
| 845 | 0.014 | 0.019 | 0.018 | 0.022 | 0.006  | 0.004  | 0.009 |
| 846 | 0.013 | 0.019 | 0.019 | 0.024 | 0.006  | 0.006  | 0.011 |
| 847 | 0.012 | 0.020 | 0.017 | 0.024 | 0.008  | 0.005  | 0.012 |
| 848 | 0.007 | 0.011 | 0.012 | 0.014 | 0.004  | 0.004  | 0.007 |
| 849 | 0.006 | 0.010 | 0.010 | 0.012 | 0.003  | 0.004  | 0.006 |
| 850 | 0.008 | 0.013 | 0.014 | 0.017 | 0.005  | 0.007  | 0.009 |
| 851 | 0.006 | 0.012 | 0.013 | 0.016 | 0.006  | 0.007  | 0.010 |
| 852 | 0.005 | 0.010 | 0.013 | 0.013 | 0.005  | 0.008  | 0.008 |
| 853 | 0.005 | 0.012 | 0.013 | 0.015 | 0.006  | 0.008  | 0.010 |
| 854 | 0.007 | 0.015 | 0.014 | 0.019 | 0.008  | 0.007  | 0.012 |
| 855 | 0.010 | 0.019 | 0.016 | 0.023 | 0.010  | 0.006  | 0.013 |
| 856 | 0.013 | 0.026 | 0.019 | 0.030 | 0.013  | 0.006  | 0.017 |
| 857 | 0.015 | 0.028 | 0.022 | 0.036 | 0.013  | 0.007  | 0.022 |
| 858 | 0.021 | 0.036 | 0.025 | 0.041 | 0.015  | 0.004  | 0.020 |
| 859 | 0.025 | 0.040 | 0.027 | 0.048 | 0.015  | 0.002  | 0.023 |
| 860 | 0.031 | 0.049 | 0.027 | 0.054 | 0.018  | -0.003 | 0.023 |
| 861 | 0.040 | 0.055 | 0.035 | 0.056 | 0.015  | -0.005 | 0.016 |
| 862 | 0.035 | 0.046 | 0.036 | 0.051 | 0.012  | 0.002  | 0.017 |
| 863 | 0.028 | 0.043 | 0.034 | 0.045 | 0.015  | 0.006  | 0.016 |
| 864 | 0.039 | 0.051 | 0.042 | 0.046 | 0.012  | 0.002  | 0.007 |
| 865 | 0.043 | 0.050 | 0.037 | 0.051 | 0.007  | -0.007 | 0.008 |
| 866 | 0.036 | 0.028 | 0.029 | 0.043 | -0.008 | -0.007 | 0.007 |
| 867 | 0.036 | 0.030 | 0.032 | 0.041 | -0.006 | -0.003 | 0.005 |

|     |       |       |       |       |        |        |        |
|-----|-------|-------|-------|-------|--------|--------|--------|
| 868 | 0.044 | 0.016 | 0.033 | 0.044 | -0.028 | -0.011 | -0.001 |
| 869 | 0.049 | 0.015 | 0.018 | 0.046 | -0.034 | -0.032 | -0.003 |
| 870 | 0.053 | 0.052 | 0.036 | 0.044 | -0.001 | -0.017 | -0.009 |
| 871 | 0.046 | 0.049 | 0.047 | 0.038 | 0.003  | 0.002  | -0.007 |
| 872 | 0.050 | 0.049 | 0.045 | 0.044 | -0.001 | -0.005 | -0.006 |
| 873 | 0.042 | 0.041 | 0.036 | 0.034 | -0.001 | -0.006 | -0.008 |
| 874 | 0.040 | 0.040 | 0.037 | 0.031 | 0.000  | -0.003 | -0.009 |
| 875 | 0.045 | 0.044 | 0.044 | 0.034 | -0.001 | -0.001 | -0.011 |
| 876 | 0.046 | 0.043 | 0.044 | 0.035 | -0.003 | -0.002 | -0.011 |
| 877 | 0.038 | 0.036 | 0.038 | 0.026 | -0.002 | 0.000  | -0.012 |
| 878 | 0.039 | 0.035 | 0.041 | 0.025 | -0.003 | 0.003  | -0.013 |
| 879 | 0.046 | 0.040 | 0.045 | 0.031 | -0.006 | -0.001 | -0.016 |
| 880 | 0.042 | 0.037 | 0.045 | 0.026 | -0.006 | 0.002  | -0.017 |
| 881 | 0.036 | 0.032 | 0.039 | 0.021 | -0.004 | 0.003  | -0.015 |
| 882 | 0.040 | 0.034 | 0.045 | 0.023 | -0.006 | 0.004  | -0.017 |
| 883 | 0.045 | 0.037 | 0.045 | 0.025 | -0.008 | -0.001 | -0.021 |
| 884 | 0.036 | 0.030 | 0.041 | 0.020 | -0.005 | 0.005  | -0.016 |
| 885 | 0.033 | 0.028 | 0.039 | 0.017 | -0.005 | 0.006  | -0.016 |
| 886 | 0.040 | 0.032 | 0.045 | 0.020 | -0.008 | 0.005  | -0.020 |
| 887 | 0.038 | 0.029 | 0.045 | 0.020 | -0.009 | 0.006  | -0.018 |
| 888 | 0.028 | 0.022 | 0.035 | 0.015 | -0.006 | 0.007  | -0.013 |
| 889 | 0.029 | 0.023 | 0.034 | 0.015 | -0.006 | 0.005  | -0.014 |
| 890 | 0.037 | 0.028 | 0.039 | 0.019 | -0.009 | 0.002  | -0.018 |
| 891 | 0.031 | 0.023 | 0.034 | 0.017 | -0.009 | 0.003  | -0.015 |
| 892 | 0.024 | 0.016 | 0.028 | 0.012 | -0.007 | 0.005  | -0.011 |
| 893 | 0.022 | 0.015 | 0.025 | 0.011 | -0.007 | 0.003  | -0.010 |
| 894 | 0.024 | 0.017 | 0.026 | 0.012 | -0.007 | 0.002  | -0.012 |
| 895 | 0.023 | 0.016 | 0.025 | 0.012 | -0.007 | 0.002  | -0.012 |
| 896 | 0.026 | 0.019 | 0.026 | 0.014 | -0.007 | 0.000  | -0.012 |
| 897 | 0.031 | 0.025 | 0.037 | 0.017 | -0.006 | 0.006  | -0.015 |
| 898 | 0.030 | 0.023 | 0.034 | 0.015 | -0.007 | 0.005  | -0.015 |
| 899 | 0.032 | 0.024 | 0.035 | 0.016 | -0.008 | 0.003  | -0.016 |
| 900 | 0.041 | 0.032 | 0.040 | 0.021 | -0.009 | 0.000  | -0.020 |

|     |       |       |       |       |        |        |        |
|-----|-------|-------|-------|-------|--------|--------|--------|
| 901 | 0.037 | 0.029 | 0.041 | 0.021 | -0.008 | 0.004  | -0.016 |
| 902 | 0.034 | 0.027 | 0.038 | 0.019 | -0.007 | 0.004  | -0.015 |
| 903 | 0.040 | 0.032 | 0.043 | 0.023 | -0.008 | 0.003  | -0.017 |
| 904 | 0.042 | 0.034 | 0.044 | 0.026 | -0.008 | 0.002  | -0.016 |
| 905 | 0.038 | 0.029 | 0.038 | 0.023 | -0.009 | 0.000  | -0.015 |
| 906 | 0.044 | 0.031 | 0.040 | 0.024 | -0.013 | -0.004 | -0.020 |
| 907 | 0.056 | 0.037 | 0.046 | 0.031 | -0.019 | -0.010 | -0.025 |
| 908 | 0.050 | 0.038 | 0.047 | 0.032 | -0.012 | -0.003 | -0.018 |
| 909 | 0.044 | 0.034 | 0.042 | 0.028 | -0.010 | -0.002 | -0.017 |
| 910 | 0.048 | 0.037 | 0.046 | 0.031 | -0.011 | -0.002 | -0.018 |
| 911 | 0.047 | 0.044 | 0.050 | 0.038 | -0.004 | 0.003  | -0.010 |
| 912 | 0.049 | 0.041 | 0.046 | 0.034 | -0.009 | -0.003 | -0.015 |
| 913 | 0.040 | 0.036 | 0.043 | 0.031 | -0.004 | 0.003  | -0.009 |
| 914 | 0.039 | 0.040 | 0.047 | 0.036 | 0.001  | 0.008  | -0.003 |
| 915 | 0.040 | 0.044 | 0.051 | 0.042 | 0.005  | 0.011  | 0.003  |
| 916 | 0.034 | 0.039 | 0.045 | 0.037 | 0.005  | 0.011  | 0.003  |
| 917 | 0.033 | 0.033 | 0.040 | 0.032 | 0.000  | 0.007  | -0.001 |
| 918 | 0.044 | 0.039 | 0.043 | 0.039 | -0.006 | -0.001 | -0.005 |
| 919 | 0.034 | 0.042 | 0.045 | 0.045 | 0.008  | 0.011  | 0.011  |
| 920 | 0.054 | 0.047 | 0.049 | 0.050 | -0.007 | -0.005 | -0.004 |
| 921 | 0.055 | 0.049 | 0.051 | 0.049 | -0.006 | -0.004 | -0.006 |
| 922 | 0.056 | 0.051 | 0.055 | 0.046 | -0.006 | -0.001 | -0.011 |
| 923 | 0.061 | 0.055 | 0.058 | 0.050 | -0.006 | -0.003 | -0.011 |
| 924 | 0.062 | 0.058 | 0.059 | 0.052 | -0.003 | -0.002 | -0.010 |
| 925 | 0.062 | 0.061 | 0.048 | 0.041 | -0.001 | -0.014 | -0.021 |
| 926 | 0.064 | 0.057 | 0.053 | 0.046 | -0.007 | -0.011 | -0.018 |
| 927 | 0.058 | 0.055 | 0.046 | 0.046 | -0.003 | -0.013 | -0.012 |
| 928 | 0.061 | 0.057 | 0.041 | 0.049 | -0.004 | -0.020 | -0.012 |
| 929 | 0.068 | 0.052 | 0.053 | 0.048 | -0.016 | -0.015 | -0.020 |
| 930 | 0.063 | 0.050 | 0.055 | 0.042 | -0.013 | -0.008 | -0.022 |
| 931 | 0.057 | 0.048 | 0.054 | 0.040 | -0.010 | -0.003 | -0.017 |
| 932 | 0.066 | 0.050 | 0.055 | 0.043 | -0.017 | -0.012 | -0.023 |
| 933 | 0.065 | 0.045 | 0.054 | 0.040 | -0.020 | -0.011 | -0.025 |

|     |       |       |       |       |        |        |        |
|-----|-------|-------|-------|-------|--------|--------|--------|
| 934 | 0.054 | 0.042 | 0.053 | 0.034 | -0.012 | -0.001 | -0.020 |
| 935 | 0.059 | 0.045 | 0.048 | 0.039 | -0.014 | -0.011 | -0.021 |
| 936 | 0.068 | 0.045 | 0.054 | 0.041 | -0.024 | -0.015 | -0.027 |
| 937 | 0.055 | 0.040 | 0.052 | 0.032 | -0.015 | -0.004 | -0.023 |
| 938 | 0.050 | 0.040 | 0.050 | 0.031 | -0.010 | 0.000  | -0.019 |
| 939 | 0.058 | 0.043 | 0.042 | 0.038 | -0.015 | -0.016 | -0.020 |
| 940 | 0.055 | 0.040 | 0.052 | 0.032 | -0.015 | -0.003 | -0.023 |
| 941 | 0.048 | 0.035 | 0.048 | 0.026 | -0.013 | 0.000  | -0.022 |
| 942 | 0.044 | 0.034 | 0.033 | 0.026 | -0.010 | -0.011 | -0.018 |
| 943 | 0.044 | 0.036 | 0.033 | 0.029 | -0.008 | -0.010 | -0.015 |
| 944 | 0.039 | 0.029 | 0.043 | 0.023 | -0.010 | 0.004  | -0.016 |
| 945 | 0.036 | 0.026 | 0.031 | 0.020 | -0.011 | -0.006 | -0.016 |
| 946 | 0.037 | 0.025 | 0.022 | 0.021 | -0.012 | -0.015 | -0.016 |
| 947 | 0.034 | 0.024 | 0.020 | 0.015 | -0.010 | -0.014 | -0.019 |
| 948 | 0.029 | 0.021 | 0.024 | 0.017 | -0.009 | -0.005 | -0.013 |
| 949 | 0.027 | 0.018 | 0.019 | 0.015 | -0.009 | -0.009 | -0.012 |
| 950 | 0.029 | 0.019 | 0.013 | 0.014 | -0.010 | -0.016 | -0.015 |
| 951 | 0.023 | 0.015 | 0.014 | 0.010 | -0.008 | -0.009 | -0.013 |
| 952 | 0.018 | 0.012 | 0.015 | 0.010 | -0.006 | -0.003 | -0.008 |
| 953 | 0.017 | 0.011 | 0.012 | 0.009 | -0.006 | -0.005 | -0.009 |
| 954 | 0.015 | 0.010 | 0.009 | 0.007 | -0.005 | -0.006 | -0.008 |
| 955 | 0.011 | 0.008 | 0.010 | 0.006 | -0.003 | -0.001 | -0.005 |
| 956 | 0.014 | 0.010 | 0.014 | 0.008 | -0.003 | 0.000  | -0.006 |
| 957 | 0.014 | 0.010 | 0.015 | 0.008 | -0.004 | 0.001  | -0.006 |
| 958 | 0.018 | 0.011 | 0.017 | 0.009 | -0.006 | -0.001 | -0.008 |
| 959 | 0.016 | 0.011 | 0.018 | 0.009 | -0.005 | 0.002  | -0.007 |
| 960 | 0.015 | 0.011 | 0.016 | 0.009 | -0.004 | 0.001  | -0.006 |
| 961 | 0.020 | 0.014 | 0.019 | 0.012 | -0.006 | -0.001 | -0.008 |
| 962 | 0.023 | 0.016 | 0.025 | 0.014 | -0.007 | 0.002  | -0.009 |
| 963 | 0.022 | 0.015 | 0.026 | 0.013 | -0.007 | 0.004  | -0.009 |
| 964 | 0.024 | 0.017 | 0.026 | 0.015 | -0.007 | 0.002  | -0.009 |
| 965 | 0.029 | 0.021 | 0.031 | 0.019 | -0.008 | 0.002  | -0.011 |
| 966 | 0.031 | 0.023 | 0.037 | 0.018 | -0.008 | 0.006  | -0.012 |

|     |       |       |       |       |        |        |        |
|-----|-------|-------|-------|-------|--------|--------|--------|
| 967 | 0.030 | 0.022 | 0.035 | 0.017 | -0.008 | 0.005  | -0.013 |
| 968 | 0.033 | 0.023 | 0.037 | 0.020 | -0.009 | 0.004  | -0.013 |
| 969 | 0.038 | 0.028 | 0.044 | 0.023 | -0.010 | 0.005  | -0.016 |
| 970 | 0.042 | 0.029 | 0.040 | 0.021 | -0.013 | -0.001 | -0.021 |
| 971 | 0.042 | 0.030 | 0.042 | 0.021 | -0.011 | 0.001  | -0.020 |
| 972 | 0.046 | 0.033 | 0.047 | 0.026 | -0.013 | 0.001  | -0.020 |
| 973 | 0.049 | 0.036 | 0.048 | 0.027 | -0.012 | -0.001 | -0.021 |
| 974 | 0.053 | 0.037 | 0.048 | 0.026 | -0.016 | -0.005 | -0.027 |
| 975 | 0.052 | 0.039 | 0.047 | 0.028 | -0.013 | -0.005 | -0.025 |
| 976 | 0.061 | 0.043 | 0.051 | 0.034 | -0.018 | -0.010 | -0.027 |
| 977 | 0.058 | 0.044 | 0.053 | 0.033 | -0.014 | -0.006 | -0.026 |
| 978 | 0.052 | 0.043 | 0.051 | 0.031 | -0.010 | -0.002 | -0.021 |
| 979 | 0.058 | 0.051 | 0.052 | 0.036 | -0.007 | -0.005 | -0.021 |
| 980 | 0.067 | 0.054 | 0.049 | 0.043 | -0.012 | -0.017 | -0.024 |
| 981 | 0.061 | 0.049 | 0.052 | 0.042 | -0.013 | -0.009 | -0.020 |
| 982 | 0.056 | 0.048 | 0.051 | 0.044 | -0.009 | -0.005 | -0.013 |
| 983 | 0.064 | 0.051 | 0.048 | 0.046 | -0.013 | -0.016 | -0.018 |
| 984 | 0.068 | 0.052 | 0.049 | 0.050 | -0.016 | -0.019 | -0.018 |
| 985 | 0.057 | 0.047 | 0.051 | 0.045 | -0.010 | -0.007 | -0.012 |
| 986 | 0.052 | 0.048 | 0.048 | 0.046 | -0.004 | -0.004 | -0.006 |
| 987 | 0.061 | 0.046 | 0.048 | 0.050 | -0.015 | -0.013 | -0.011 |
| 988 | 0.060 | 0.052 | 0.053 | 0.052 | -0.008 | -0.007 | -0.008 |
| 989 | 0.047 | 0.048 | 0.048 | 0.044 | 0.001  | 0.000  | -0.003 |
| 990 | 0.050 | 0.049 | 0.052 | 0.049 | -0.001 | 0.001  | -0.001 |
| 991 | 0.049 | 0.051 | 0.046 | 0.047 | 0.001  | -0.004 | -0.003 |
| 992 | 0.048 | 0.052 | 0.038 | 0.021 | 0.004  | -0.010 | -0.027 |
| 993 | 0.053 | 0.057 | 0.052 | 0.012 | 0.004  | 0.000  | -0.041 |
| 994 | 0.055 | 0.058 | 0.020 | 0.021 | 0.003  | -0.035 | -0.034 |
| 995 | 0.054 | 0.053 | 0.050 | 0.039 | -0.001 | -0.004 | -0.014 |
| 996 | 0.058 | 0.053 | 0.059 | 0.031 | -0.005 | 0.002  | -0.027 |
| 997 | 0.062 | 0.059 | 0.050 | 0.020 | -0.002 | -0.011 | -0.042 |
| 998 | 0.060 | 0.053 | 0.056 | 0.022 | -0.007 | -0.004 | -0.038 |
| 999 | 0.058 | 0.053 | 0.057 | 0.037 | -0.005 | -0.001 | -0.022 |



|      |       |       |       |       |        |        |        |
|------|-------|-------|-------|-------|--------|--------|--------|
| 1000 | 0.064 | 0.057 | 0.060 | 0.016 | -0.007 | -0.004 | -0.048 |
| 1001 | 0.067 | 0.044 | 0.058 | 0.016 | -0.023 | -0.009 | -0.051 |
| 1002 | 0.068 | 0.051 | 0.055 | 0.017 | -0.017 | -0.014 | -0.051 |
| 1003 | 0.058 | 0.048 | 0.053 | 0.023 | -0.010 | -0.005 | -0.035 |
| 1004 | 0.038 | 0.045 | 0.054 | 0.051 | 0.006  | 0.015  | 0.012  |
| 1005 | 0.034 | 0.046 | 0.053 | 0.048 | 0.013  | 0.019  | 0.014  |
| 1006 | 0.056 | 0.045 | 0.050 | 0.041 | -0.012 | -0.007 | -0.015 |
| 1007 | 0.043 | 0.043 | 0.048 | 0.037 | -0.001 | 0.005  | -0.006 |
| 1008 | 0.045 | 0.042 | 0.048 | 0.036 | -0.003 | 0.004  | -0.009 |
| 1009 | 0.053 | 0.040 | 0.048 | 0.035 | -0.013 | -0.005 | -0.018 |
| 1010 | 0.053 | 0.038 | 0.046 | 0.030 | -0.016 | -0.008 | -0.024 |
| 1011 | 0.046 | 0.034 | 0.042 | 0.027 | -0.012 | -0.004 | -0.019 |
| 1012 | 0.046 | 0.035 | 0.046 | 0.028 | -0.010 | 0.000  | -0.018 |
| 1013 | 0.053 | 0.037 | 0.048 | 0.028 | -0.016 | -0.005 | -0.025 |
| 1014 | 0.046 | 0.031 | 0.042 | 0.025 | -0.014 | -0.004 | -0.021 |
| 1015 | 0.045 | 0.027 | 0.036 | 0.022 | -0.017 | -0.008 | -0.023 |
| 1016 | 0.043 | 0.029 | 0.041 | 0.023 | -0.014 | -0.002 | -0.021 |
| 1017 | 0.041 | 0.028 | 0.039 | 0.021 | -0.013 | -0.002 | -0.020 |
| 1018 | 0.032 | 0.022 | 0.032 | 0.016 | -0.010 | -0.001 | -0.016 |
| 1019 | 0.031 | 0.022 | 0.030 | 0.016 | -0.009 | -0.001 | -0.015 |
| 1020 | 0.036 | 0.026 | 0.038 | 0.019 | -0.010 | 0.002  | -0.016 |
| 1021 | 0.029 | 0.019 | 0.030 | 0.015 | -0.010 | 0.001  | -0.013 |
| 1022 | 0.024 | 0.016 | 0.024 | 0.012 | -0.008 | 0.000  | -0.012 |
| 1023 | 0.029 | 0.019 | 0.028 | 0.013 | -0.010 | -0.001 | -0.016 |
| 1024 | 0.026 | 0.017 | 0.025 | 0.014 | -0.008 | 0.000  | -0.012 |
| 1025 | 0.022 | 0.013 | 0.021 | 0.010 | -0.008 | -0.001 | -0.012 |
| 1026 | 0.024 | 0.014 | 0.020 | 0.010 | -0.011 | -0.004 | -0.014 |
| 1027 | 0.007 | 0.013 | 0.019 | 0.010 | 0.007  | 0.013  | 0.003  |
| 1028 | 0.006 | 0.013 | 0.018 | 0.009 | 0.007  | 0.012  | 0.003  |
| 1029 | 0.003 | 0.012 | 0.019 | 0.008 | 0.009  | 0.016  | 0.005  |
| 1030 | 0.004 | 0.013 | 0.017 | 0.010 | 0.009  | 0.013  | 0.007  |

**Figure. S11.** Line plot showing comparative root mean squared fluctuation values for apo and ligand bound MexB L protomer excluding Variant 1.

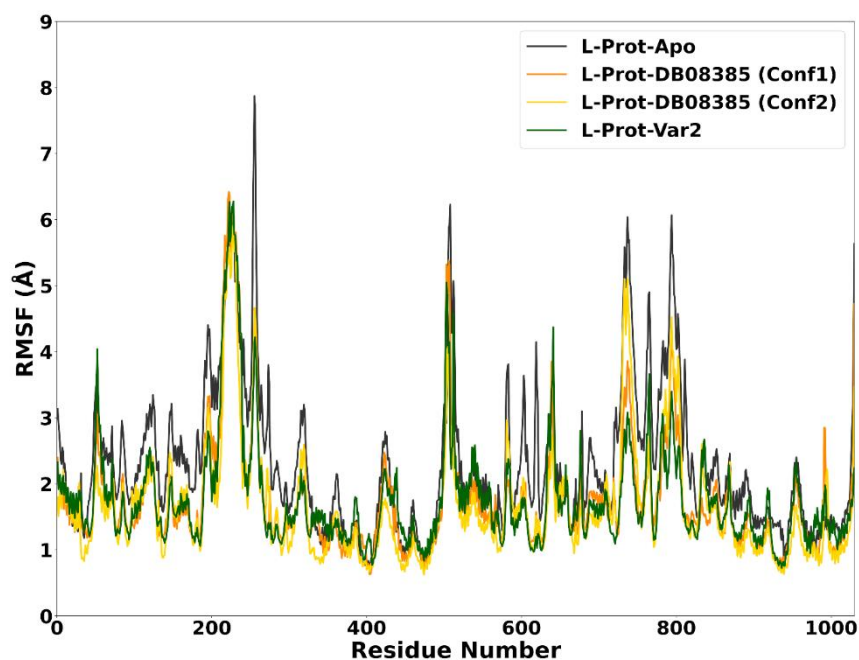

**Section. S1.** gmx\_MMPBSA input parameters

input file generated by gmx\_MMPBSA (v1.6.3)

Be careful with the variables you modify; some can have severe consequences on the results you obtain.

# General namelist variables

&general

```

sys_name          = "mmpbsa1"                # System name
startframe        = 1                        # First frame to analyze
endframe          = 500                      # Last frame to analyze
interval          = 10                      # Number of frames between adjacent
frames analyzed
PBRadii           = 7                      # Define PBRadii to build amber topology
from GROMACS files
temperature       = 310                     # Temperature

```

```

    verbose          = 1                # How many energy terms to print in the
final output

    interaction_entropy= 1

    ie_segment= 25

/

# (AMBER) Poission-Boltzmann namelist variables

&pb

    ipb             = 1                # Dielectric model for PB
    inp             = 2                # Nonpolar solvation method
    sander_apbs     = 0                # Use sander.APBS?
    indi            = 2.0              # Internal dielectric constant
    exdi            = 80.0             # External dielectric constant
    istrng          = 0.150           # Ionic strength (M)
    radiopt         = 0                # Use optimized radii?
    fillratio       = 1.25             # Ratio between the longest dimension of
the rectangular finite-difference grid and that of the solute

    memopt          = 3
    solvopt         = 2
    emem            = 4.0
    mctrdz          = 7.0
    mthick          = 40.0
    poretype        = 1
    sasopt          = 0
    bcopt           = 10
    nfocus          = 1
    linit           = 1000
    eneopt          = 1
    cutfd           = 7.0

```

cutnb = 99.0

maxarcdot = 15000

npbverb = 1

/
